# Supplementary material for: Metabolic Scaling in Birds and Mammals: How Taxon Divergence Time, Phylogeny, and Metabolic Rate Affect the Relationship between Scaling Exponents and Intercepts
Source: MDPI journal article supplement (doi:10.3390/biology11071067), 2022-07-18
Supplement: s1 [file s1]

Table S2. Avian BMR.

| Class | HighTaxon    | Taxon     | Species                         | body mass, g | BMR, mlO <sub>2</sub> /h | Reference                  |
|-------|--------------|-----------|---------------------------------|--------------|--------------------------|----------------------------|
| Aves  | Paleognathae | Apterygi  | <i>Apteryx australis</i>        | 3137.00      | 830.00                   | McNab 1996                 |
| Aves  | Paleognathae | Apterygi  | <i>Apteryx haastii</i>          | 2529.00      | 951.00                   | McNab 1996                 |
| Aves  | Paleognathae | Apterygi  | <i>Apteryx owenii</i>           | 1377.00      | 710.50                   | McNab 1996                 |
| Aves  | Paleognathae | Casuari   | <i>Casuarius bennetti</i>       | 17600.00     | 4501.00                  | Benedict, Fox, 1927        |
| Aves  | Paleognathae | Casuari   | <i>Dromaius novaehollandiae</i> | 38900.00     | 6302.00                  | Maloney & Dawson 1994      |
| Aves  | Paleognathae | Rhea      | <i>Rhea americana</i>           | 21700.00     | 6900.00                  | Grawford, Lasiewski, 1968  |
| Aves  | Paleognathae | Struthio  | <i>Struthio camelus</i>         | 92400.00     | 10483.00                 | Withers 1983               |
| Aves  | Paleognathae | Tinami    | <i>Crypturellus soui</i>        | 220.80       | 140.00                   | Londono et al., 2015       |
| Aves  | Paleognathae | Tinami    | <i>Nothoprocta perdicaria</i>   | 458.00       | 317.50                   | Withers et al. 1987        |
| Aves  | Non-Passer   | Accipitri | <i>Accipiter cooperii</i>       | 452.00       | 383.00                   | Wasser 1986                |
| Aves  | Non-Passer   | Accipitri | <i>Accipiter nisus</i>          | 135.00       | 171.00                   | Kendeigh et al. 1977       |
| Aves  | Non-Passer   | Accipitri | <i>Accipiter striatus</i>       | 173.40       | 94.55                    | Londono et al., 2015       |
| Aves  | Non-Passer   | Accipitri | <i>Accipiter striatus</i>       | 83.00        | 126.00                   | Wasser 1986                |
| Aves  | Non-Passer   | Accipitri | <i>Aquila chrysaetos</i>        | 3000.00      | 890.00                   | Giaja, Males, 1928         |
| Aves  | Non-Passer   | Accipitri | <i>Aquila rapax</i>             | 2398.00      | 813.50                   | Wasser 1986                |
| Aves  | Non-Passer   | Accipitri | <i>Buteo buteo</i>              | 1012.00      | 676.00                   | Prinzinger & Hanssler 1980 |
| Aves  | Non-Passer   | Accipitri | <i>Buteo jamaicensis</i>        | 1475.00      | 571.50                   | Wasser 1986                |
| Aves  | Non-Passer   | Accipitri | <i>Buteo lineatus</i>           | 658.00       | 380.00                   | Wasser 1986                |
| Aves  | Non-Passer   | Accipitri | <i>Geranoaetus melanoleucus</i> | 2860.00      | 924.50                   | Benedict, Fox, 1927        |
| Aves  | Non-Passer   | Accipitri | <i>Gypaetus barbatus</i>        | 5070.00      | 1989.00                  | Benedict, Fox, 1927_       |
| Aves  | Non-Passer   | Accipitri | <i>Ictinia mississippiensis</i> | 232.00       | 164.50                   | Wasser 1986                |
| Aves  | Non-Passer   | Accipitri | <i>Pandion haliaetus</i>        | 1495.00      | 994.00                   | Wasser 1986                |
| Aves  | Non-Passer   | Accipitri | <i>Parabuteo unicinctus</i>     | 572.00       | 253.50                   | Wasser 1986                |
| Aves  | Non-Passer   | Accipitri | <i>Pernis apivorus</i>          | 652.00       | 420.50                   | Kendeigh et al. 1977       |
| Aves  | Non-Passer   | Anseri    | <i>Aix sponsa</i>               | 448.00       | 404.50                   | Kendeigh et al. 1977       |
| Aves  | Non-Passer   | Anseri    | <i>Anas acuta</i>               | 721.00       | 785.50                   | Prinzinger & Hanssler 1980 |
| Aves  | Non-Passer   | Anseri    | <i>Anas aucklandica</i>         | 373.10       | 337.50                   | McNab 2003                 |
| Aves  | Non-Passer   | Anseri    | <i>Anas castanea</i>            | 483.30       | 343.00                   | McNab 2003                 |
| Aves  | Non-Passer   | Anseri    | <i>Anas chlorotis</i>           | 528.80       | 417.50                   | McNab 2003                 |
| Aves  | Non-Passer   | Anseri    | <i>Anas crecca</i>              | 250.00       | 300.00                   | Prinzinger & Hanssler 1980 |
| Aves  | Non-Passer   | Anseri    | <i>Anas gracilis</i>            | 393.70       | 599.00                   | McNab 2003                 |
| Aves  | Non-Passer   | Anseri    | <i>Anas nesiotis</i>            | 371.10       | 297.00                   | McNab 2003                 |
| Aves  | Non-Passer   | Anseri    | <i>Anas platyrhynchos</i>       | 1020.00      | 732.00                   | Kendeigh et al. 1977       |
| Aves  | Non-Passer   | Anseri    | <i>Anser anser</i>              | 3250.00      | 1950.50                  | Kendeigh et al. 1977       |
| Aves  | Non-Passer   | Anseri    | <i>Anser caerulescens</i>       | 2930.00      | 1395.00                  | Boisemena et al. 1992      |
| Aves  | Non-Passer   | Anseri    | <i>Anser canagicus</i>          | 2609.00      | 1612.50                  | Gavrilov & Dolnik 1985     |
| Aves  | Non-Passer   | Anseri    | <i>Aythya affinis</i>           | 561.50       | 516.50                   | McNab 2003                 |
| Aves  | Non-Passer   | Anseri    | <i>Aythya collaris</i>          | 681.50       | 592.00                   | McNab 2003                 |
| Aves  | Non-Passer   | Anseri    | <i>Aythya ferina</i>            | 816.00       | 1047.00                  | Prinzinger & Hanssler 1980 |
| Aves  | Non-Passer   | Anseri    | <i>Aythya fuligula</i>          | 574.00       | 486.50                   | Prinzinger & Hanssler 1980 |
| Aves  | Non-Passer   | Anseri    | <i>Aythya novaeseelandiae</i>   | 488.40       | 420.00                   | McNab 2003                 |
| Aves  | Non-Passer   | Anseri    | <i>Aythya nyroca</i>            | 440.00       | 589.00                   | Prinzinger & Hanssler 1980 |
| Aves  | Non-Passer   | Anseri    | <i>Branta bernicla</i>          | 1253.00      | 1091.00                  | Daan et al. 1990           |
| Aves  | Non-Passer   | Anseri    | <i>Chauna chavaria</i>          | 2620.00      | 1238.50                  | Benedict, Fox, 1927        |
| Aves  | Non-Passer   | Anseri    | <i>Cygnus buccinator</i>        | 8800.00      | 3646.50                  | Benedict, Fox, 1927        |
| Aves  | Non-Passer   | Anseri    | <i>Cygnus olor</i>              | 8538.00      | 5606.00                  | Bech 1980                  |

|      |            |        |                                    |         |         |                              |
|------|------------|--------|------------------------------------|---------|---------|------------------------------|
| Aves | Non-Passer | Anseri | <i>Hymenolaimus malacorhynchos</i> | 717.10  | 565.50  | McNab 2003                   |
| Aves | Non-Passer | Anseri | <i>Lophodytes cucullatus</i>       | 413.30  | 351.50  | McNab 2003                   |
| Aves | Non-Passer | Anseri | <i>Mareca penelope</i>             | 723.00  | 507.50  | Kendeigh et al. 1977         |
| Aves | Non-Passer | Anseri | <i>Mareca strepera</i>             | 791.00  | 1116.50 | Prinzinger & Hanssler 1980   |
| Aves | Non-Passer | Anseri | <i>Netta rufina</i>                | 1237.00 | 1278.00 | Prinzinger & Hanssler 1980   |
| Aves | Non-Passer | Anseri | <i>Somateria mollissima</i>        | 1660.00 | 1099.50 | Jenssen et al. 1989          |
| Aves | Non-Passer | Anseri | <i>Spatula clypeata</i>            | 554.00  | 698.00  | Prinzinger & Hanssler 1980   |
| Aves | Non-Passer | Anseri | <i>Spatula querquedula</i>         | 289.00  | 402.00  | Prinzinger & Hanssler 1980   |
| Aves | Non-Passer | Anseri | <i>Spatula rhynchotis</i>          | 508.00  | 473.50  | McNab 2003                   |
| Aves | Non-Passer | Anseri | <i>Tadorna variegata</i>           | 1193.60 | 602.00  | McNab 2003                   |
| Aves | Non-Passer | Apodi  | <i>Adelomyia melanogenys</i>       | 3.50    | 14.55   | Londono et al., 2015         |
| Aves | Non-Passer | Apodi  | <i>Aerodramus germani</i>          | 10.80   | 40.04   | Bushuev et al. (unpublished) |
| Aves | Non-Passer | Apodi  | <i>Aerodramus vanikorensis</i>     | 11.60   | 21.50   | McNab & Bonaccorso 1995      |
| Aves | Non-Passer | Apodi  | <i>Aglaeactis castelnaudii</i>     | 6.90    | 18.18   | Londono et al., 2015         |
| Aves | Non-Passer | Apodi  | <i>Aglaeactis cupripennis</i>      | 7.20    | 21.82   | Londono et al., 2015         |
| Aves | Non-Passer | Apodi  | <i>Apus apus</i>                   | 44.90   | 78.50   | Kendeigh et al. 1977         |
| Aves | Non-Passer | Apodi  | <i>Archilochus alexandri</i>       | 3.30    | 11.50   | Lassiewski, 1963             |
| Aves | Non-Passer | Apodi  | <i>Boissonneaua matthewsii</i>     | 7.50    | 36.36   | Londono et al., 2015         |
| Aves | Non-Passer | Apodi  | <i>Calypte anna</i>                | 4.80    | 21.00   | Lassiewski, 1963             |
| Aves | Non-Passer | Apodi  | <i>Calypte costae</i>              | 3.20    | 9.50    | Lassiewski, 1963             |
| Aves | Non-Passer | Apodi  | <i>Chaetocercus mulsant</i>        | 3.60    | 12.73   | Londono et al., 2015         |
| Aves | Non-Passer | Apodi  | <i>Chalcostigma ruficeps</i>       | 3.60    | 27.27   | Londono et al., 2015         |
| Aves | Non-Passer | Apodi  | <i>Coeligena coeligena</i>         | 7.10    | 34.55   | Londono et al., 2015         |
| Aves | Non-Passer | Apodi  | <i>Coeligena violifer</i>          | 7.80    | 25.45   | Londono et al., 2015         |
| Aves | Non-Passer | Apodi  | <i>Colibri coruscans</i>           | 8.40    | 27.27   | Londono et al., 2015         |
| Aves | Non-Passer | Apodi  | <i>Colibri thalassinus</i>         | 6.20    | 29.09   | Londono et al., 2015         |
| Aves | Non-Passer | Apodi  | <i>Collocalia esculenta</i>        | 6.80    | 14.50   | McNab & Bonaccorso 1995      |
| Aves | Non-Passer | Apodi  | <i>Doryfera ludovicae</i>          | 5.90    | 29.09   | Londono et al., 2015         |
| Aves | Non-Passer | Apodi  | <i>Eugenes fulgens</i>             | 6.60    | 18.50   | Lassiewski, Lassiewski, 1963 |
| Aves | Non-Passer | Apodi  | <i>Eulampis jugularis</i>          | 8.40    | 69.50   | Hainsworth, Wolf, 1970       |
| Aves | Non-Passer | Apodi  | <i>Eutoxeres condamini</i>         | 10.00   | 40.00   | Londono et al., 2015         |
| Aves | Non-Passer | Apodi  | <i>Glaucis hirsutus</i>            | 6.90    | 32.73   | Londono et al., 2015         |
| Aves | Non-Passer | Apodi  | <i>Haplophaedia aureliae</i>       | 4.80    | 25.45   | Londono et al., 2015         |
| Aves | Non-Passer | Apodi  | <i>Heliangelus amethysticollis</i> | 5.80    | 27.27   | Londono et al., 2015         |
| Aves | Non-Passer | Apodi  | <i>Heliodoxa leadbeateri</i>       | 7.50    | 34.55   | Londono et al., 2015         |
| Aves | Non-Passer | Apodi  | <i>Lafresnaya lafresnayi</i>       | 5.70    | 25.45   | Londono et al., 2015         |
| Aves | Non-Passer | Apodi  | <i>Lampornis clemenciae</i>        | 7.90    | 18.50   | Lassiewski, Lassiewski, 1963 |
| Aves | Non-Passer | Apodi  | <i>Metallura tyrianthina</i>       | 3.80    | 18.18   | Londono et al., 2015         |
| Aves | Non-Passer | Apodi  | <i>Ocreatus underwoodii</i>        | 3.30    | 14.55   | Londono et al., 2015         |
| Aves | Non-Passer | Apodi  | <i>Oreotrochilus estella</i>       | 8.40    | 34.50   | Carpenter 1976               |
| Aves | Non-Passer | Apodi  | <i>Patagona gigas</i>              | 19.10   | 51.50   | Lasiewski et al. 1967        |
| Aves | Non-Passer | Apodi  | <i>Phaethornis guy</i>             | 5.90    | 23.64   | Londono et al., 2015         |
| Aves | Non-Passer | Apodi  | <i>Phaethornis hispidus</i>        | 4.90    | 25.45   | Londono et al., 2015         |
| Aves | Non-Passer | Apodi  | <i>Phaethornis koepckeae</i>       | 5.40    | 23.64   | Londono et al., 2015         |
| Aves | Non-Passer | Apodi  | <i>Phaethornis superciliosus</i>   | 5.20    | 25.45   | Londono et al., 2015         |
| Aves | Non-Passer | Apodi  | <i>Phlogophilus harterti</i>       | 2.80    | 27.27   | Londono et al., 2015         |
| Aves | Non-Passer | Apodi  | <i>Pterophanes cyanopterus</i>     | 10.80   | 20.00   | Londono et al., 2015         |

|      |            |            |                                   |         |         |                                |
|------|------------|------------|-----------------------------------|---------|---------|--------------------------------|
| Aves | Non-Passer | Apodi      | <i>Ramphomicon microrhynchum</i>  | 3.90    | 14.55   | Londono et al., 2015           |
| Aves | Non-Passer | Apodi      | <i>Schistes geoffroyi</i>         | 4.80    | 32.73   | Londono et al., 2015           |
| Aves | Non-Passer | Apodi      | <i>Selasphorus calliope</i>       | 3.00    | 12.00   | Lasiewski, 1963                |
| Aves | Non-Passer | Apodi      | <i>Selasphorus rufus</i>          | 3.80    | 12.50   | Lassiewski, 1963               |
| Aves | Non-Passer | Apodi      | <i>Selasphorus sasin</i>          | 3.70    | 12.50   | Lassiewski, 1963               |
| Aves | Non-Passer | Apodi      | <i>Sephanioides sephanioides</i>  | 5.70    | 18.50   | Lopez-Calleja & Bozinovic 1995 |
| Aves | Non-Passer | Apodi      | <i>Streptoprocne rutila</i>       | 16.10   | 43.64   | Londono et al., 2015           |
| Aves | Non-Passer | Apodi      | <i>Taphrospilus hypostictus</i>   | 7.50    | 23.64   | Londono et al., 2015           |
| Aves | Non-Passer | Apodi      | <i>Thalurania furcata</i>         | 3.80    | 23.64   | Londono et al., 2015           |
| Aves | Non-Passer | Apodi      | <i>Threnetes leucurus</i>         | 9.40    | 27.27   | Londono et al., 2015           |
| Aves | Non-Passer | Caprimulgi | <i>Caprimulgus europaeus</i>      | 77.40   | 116.00  | Gavrilov, Dolnik 1985          |
| Aves | Non-Passer | Caprimulgi | <i>Caprimulgus macrurus</i>       | 73.43   | 73.49   | Bushuev et al. (unpublished)   |
| Aves | Non-Passer | Caprimulgi | <i>Caprimulgus macrurus</i>       | 68.60   | 56.00   | McNab & Bonaccorso 1995        |
| Aves | Non-Passer | Caprimulgi | <i>Chordeiles minor</i>           | 72.00   | 79.50   | Lasiewski & Dawson 1964        |
| Aves | Non-Passer | Caprimulgi | <i>Eurostopodus argus</i>         | 88.00   | 73.50   | Dawson & Fisher 1969           |
| Aves | Non-Passer | Caprimulgi | <i>Eurostopodus argus</i>         | 88.00   | 73.50   | Dawson, Fisher, 1969           |
| Aves | Non-Passer | Caprimulgi | <i>Eurostopodus mystacalis</i>    | 162.00  | 86.50   | McNab & Bonaccorso 1995        |
| Aves | Non-Passer | Caprimulgi | <i>Lyncornis macrotis</i>         | 162.80  | 147.40  | Bushuev et al. (unpublished)   |
| Aves | Non-Passer | Caprimulgi | <i>Nyctidromus albicollis</i>     | 43.00   | 83.00   | Scholander et al., 1950        |
| Aves | Non-Passer | Caprimulgi | <i>Phalaenoptilus nuttallii</i>   | 40.00   | 32.00   | Bartholomew et al. 1962        |
| Aves | Non-Passer | Caprimulgi | <i>Podargus ocellatus</i>         | 145.00  | 102.00  | Lasiewski et al. 1970          |
| Aves | Non-Passer | Caprimulgi | <i>Podargus papuensis</i>         | 314.60  | 192.50  | McNab & Bonaccorso 1995        |
| Aves | Non-Passer | Caprimulgi | <i>Podargus strigoides</i>        | 380.30  | 186.00  | Bech & Nichol 1999             |
| Aves | Non-Passer | Caprimulgi | <i>Uropsalis lyra</i>             | 77.50   | 94.55   | Londono et al., 2015           |
| Aves | Non-Passer | Caprimulgi | <i>Uropsalis segmentata</i>       | 34.70   | 98.18   | Londono et al., 2015           |
| Aves | Non-Passer | Catharti   | <i>Cathartes aura</i>             | 1100.00 | 515.00  | Enger, 1957                    |
| Aves | Non-Passer | Catharti   | <i>Coragyps atratus</i>           | 1700.00 | 798.00  | Enger, 1957                    |
| Aves | Non-Passer | Catharti   | <i>Coragyps atratus</i>           | 2120.00 | 1171.50 | Larochelle et al., 1982        |
| Aves | Non-Passer | Charadrii  | <i>Alca torda</i>                 | 589.00  | 648.00  | Bryant & Furness 1995          |
| Aves | Non-Passer | Charadrii  | <i>Alle alle</i>                  | 152.50  | 370.00  | Gabrielsen et al. 1991         |
| Aves | Non-Passer | Charadrii  | <i>Arenaria interpres</i>         | 90.00   | 166.00  | Kersten & Piersma 1987         |
| Aves | Non-Passer | Charadrii  | <i>Calidris canutus</i>           | 130.00  | 158.50  | Piersma et al. 1995            |
| Aves | Non-Passer | Charadrii  | <i>Cepphus grylle</i>             | 342.20  | 546.00  | Gabrielsen et al. 1991         |
| Aves | Non-Passer | Charadrii  | <i>Charadrius dubius</i>          | 36.00   | 75.00   | Kendeigh et al. 1977           |
| Aves | Non-Passer | Charadrii  | <i>Chroicocephalus ridibundus</i> | 306.00  | 335.00  | Kendeigh et al. 1977           |
| Aves | Non-Passer | Charadrii  | <i>Fratercula arctica</i>         | 329.00  | 462.50  | Bryant & Furness 1995          |
| Aves | Non-Passer | Charadrii  | <i>Haematopus ostralegus</i>      | 554.00  | 524.00  | Kersten & Piersma 1987         |
| Aves | Non-Passer | Charadrii  | <i>Jacana jacana</i>              | 107.00  | 181.00  | Wiersma et al. 2007            |
| Aves | Non-Passer | Charadrii  | <i>Larus argentatus</i>           | 924.00  | 891.50  | Bryant & Furness 1995          |
| Aves | Non-Passer | Charadrii  | <i>Larus canus</i>                | 431.00  | 405.00  | Kendeigh et al. 1977           |

|      |            |           |                                 |         |         |                              |
|------|------------|-----------|---------------------------------|---------|---------|------------------------------|
| Aves | Non-Passer | Charadrii | <i>Larus hyperboreus</i>        | 1600.00 | 2664.00 | Scholander et al., 1950      |
| Aves | Non-Passer | Charadrii | <i>Larus pacificus</i>          | 1210.00 | 1107.50 | Benedict, Fox, 1927          |
| Aves | Non-Passer | Charadrii | <i>Limosa lapponica</i>         | 240.00  | 273.50  | Daan et al. 1990             |
| Aves | Non-Passer | Charadrii | <i>Pluvialis apricaria</i>      | 151.00  | 223.50  | Daan et al. 1990             |
| Aves | Non-Passer | Charadrii | <i>Pluvialis squatarola</i>     | 226.00  | 320.50  | Kersten & Piersma 1987       |
| Aves | Non-Passer | Charadrii | <i>Rhodostethia rosea</i>       | 155.00  | 191.50  | Gavrilov 1996                |
| Aves | Non-Passer | Charadrii | <i>Rissa tridactyla</i>         | 305.00  | 494.00  | Bryant & Furness 1995        |
| Aves | Non-Passer | Charadrii | <i>Scolopax minor</i>           | 156.70  | 192.50  | Vander Haegen et al. 1994    |
| Aves | Non-Passer | Charadrii | <i>Scolopax rusticola</i>       | 430.00  | 389.00  | Kendeigh et al. 1977         |
| Aves | Non-Passer | Charadrii | <i>Stercorarius</i>             |         |         |                              |
| Aves | Non-Passer | Charadrii | <i>maccormicki</i>              | 1130.00 | 1547.50 | Ricklefs, Mattew, 1983       |
| Aves | Non-Passer | Charadrii | <i>Stercorarius parasiticus</i> | 351.00  | 414.50  | Bryant & Furness 1995        |
| Aves | Non-Passer | Charadrii | <i>Stercorarius skua</i>        | 970.00  | 855.00  | Benedict, Fox, 1927          |
| Aves | Non-Passer | Charadrii | <i>Stercorarius skua</i>        | 1159.00 | 1121.00 | Bryant & Furness 1995        |
| Aves | Non-Passer | Charadrii | <i>Thinocorus rumicivorus</i>   | 55.50   | 56.00   | Ehlers & Morton 1982         |
| Aves | Non-Passer | Charadrii | <i>Tringa ochropus</i>          | 90.00   | 166.00  | Prinzinger, Hanssler, 1980   |
| Aves | Non-Passer | Charadrii | <i>Turnix suscitator</i>        | 66.00   | 73.25   | Bushuev et al. (unpublished) |
| Aves | Non-Passer | Charadrii | <i>Uria aalge</i>               | 771.00  | 812.50  | Bryant & Furness 1995        |
| Aves | Non-Passer | Charadrii | <i>Uria lomvia</i>              | 819.00  | 912.50  | Bryant & Furness 1995        |
| Aves | Non-Passer | Ciconii   | <i>Jabiru mycteria</i>          | 5470.00 | 2372.50 | Benedict, Fox, 1927          |
| Aves | Non-Passer | Ciconii   | <i>Leptoptilos javanicus</i>    | 5710.00 | 2678.00 | Benedict, Fox, 1927          |
| Aves | Non-Passer | Ciconii   | <i>Mycteria americana</i>       | 2500.00 | 1753.50 | Kahl, 1962                   |
| Aves | Non-Passer | Colii     | <i>Colius castanotus</i>        | 69.00   | 83.00   | Prinzinger et al. 1981       |
| Aves | Non-Passer | Colii     | <i>Colius colius</i>            | 35.10   | 32.00   | McKechnie & Lovegrove 2001b  |
| Aves | Non-Passer | Colii     | <i>Colius striatus</i>          | 51.00   | 42.50   | McKechnie & Lovegrove 2001a  |
| Aves | Non-Passer | Colii     | <i>Urocolius indicus</i>        | 53.50   | 129.00  | Hoffmann, Prinzinger, 1984   |
| Aves | Non-Passer | Colii     | <i>Urocolius macrourus</i>      | 51.30   | 43.00   | Prinzinger 1988              |
| Aves | Non-Passer | Columbi   | <i>Caloenas nicobarica</i>      | 613.00  | 326.50  | McNab 2000                   |
| Aves | Non-Passer | Columbi   | <i>Chalcophaps indica</i>       | 115.95  | 132.76  | Bushuev et al. (unpublished) |
| Aves | Non-Passer | Columbi   | <i>Chalcophaps indica</i>       | 124.00  | 142.50  | Schleucher & Withers 2002    |
| Aves | Non-Passer | Columbi   | <i>Columba leucomela</i>        | 456.00  | 438.50  | Schleucher & Withers 2002    |
| Aves | Non-Passer | Columbi   | <i>Columba livia</i>            | 368.00  | 298.50  | Gavrilov & Dol'nik 1985      |
| Aves | Non-Passer | Columbi   | <i>Columba palumbus</i>         | 493.00  | 357.00  | Gavrilov, Dolnik 1985        |
| Aves | Non-Passer | Columbi   | <i>Columba vitiensis</i>        | 467.90  | 260.00  | McNab 2000                   |
| Aves | Non-Passer | Columbi   | <i>Columbina inca</i>           | 41.50   | 47.00   | MacMillen & Trost 1967       |
| Aves | Non-Passer | Columbi   | <i>Columbina inca</i>           | 40.50   | 45.50   | MacMillen, Trost, 1965       |
| Aves | Non-Passer | Columbi   | <i>Columbina talpacoti</i>      | 45.70   | 74.50   | Wiersma et al. 2007          |
| Aves | Non-Passer | Columbi   | <i>Drepanoptila holosericea</i> | 198.00  | 148.50  | Schleucher 2002              |
| Aves | Non-Passer | Columbi   | <i>Ducula pacifica</i>          | 333.40  | 143.00  | McNab 2000                   |
| Aves | Non-Passer | Columbi   | <i>Ducula pinon</i>             | 583.80  | 320.50  | McNab 2000                   |
| Aves | Non-Passer | Columbi   | <i>Ducula pistrinaria</i>       | 394.20  | 193.00  | McNab 2000                   |
| Aves | Non-Passer | Columbi   | <i>Ducula radiata</i>           | 333.60  | 253.00  | McNab 2000                   |
| Aves | Non-Passer | Columbi   | <i>Ducula rubricera</i>         | 418.80  | 245.50  | McNab 2000                   |
| Aves | Non-Passer | Columbi   | <i>Ducula rufigaster</i>        | 376.70  | 229.00  | McNab 2000                   |
| Aves | Non-Passer | Columbi   | <i>Ducula spilorrhoa</i>        | 453.60  | 247.00  | McNab 2000                   |
| Aves | Non-Passer | Columbi   | <i>Ducula zoeae</i>             | 456.20  | 306.50  | McNab 2000                   |
| Aves | Non-Passer | Columbi   | <i>Geopelia cuneata</i>         | 39.00   | 48.00   | Schleucher & Withers 2002    |
| Aves | Non-Passer | Columbi   | <i>Geopelia placida</i>         | 52.00   | 64.00   | Schleucher & Withers 2002    |
| Aves | Non-Passer | Columbi   | <i>Geopelia striata</i>         | 51.56   | 70.37   | Bushuev et al. (unpublished) |
| Aves | Non-Passer | Columbi   | <i>Geophaps plumifera</i>       | 81.00   | 71.50   | Dawson, Bennett, 1973        |
| Aves | Non-Passer | Columbi   | <i>Geophaps plumifera</i>       | 81.00   | 76.00   | Withers & Williams 1990      |

|      |            |         |                                   |         |        |                              |
|------|------------|---------|-----------------------------------|---------|--------|------------------------------|
| Aves | Non-Passer | Columbi | <i>Geophaps smithii</i>           | 198.00  | 157.00 | Schleucher & Withers 2002    |
| Aves | Non-Passer | Columbi | <i>Geotrygon montana</i>          | 117.90  | 149.09 | Londono et al., 2015         |
| Aves | Non-Passer | Columbi | <i>Geotrygon montana</i>          | 107.30  | 121.50 | Wiersma et al. 2007          |
| Aves | Non-Passer | Columbi | <i>Goura cristata</i>             | 2313.40 | 768.00 | McNab 2000                   |
| Aves | Non-Passer | Columbi | <i>Gymnophaps albertisii</i>      | 241.60  | 170.00 | McNab 2000                   |
| Aves | Non-Passer | Columbi | <i>Hemiphaga novaeseelandiae</i>  | 435.60  | 339.00 | McNab 2000                   |
| Aves | Non-Passer | Columbi | <i>Leptotila rufaxilla</i>        | 150.60  | 125.45 | Londono et al., 2015         |
| Aves | Non-Passer | Columbi | <i>Leptotila verreauxi</i>        | 131.00  | 159.50 | Vleck & Vleck 1979           |
| Aves | Non-Passer | Columbi | <i>Leucosarcia melanoleuca</i>    | 468.00  | 301.00 | McNab 2000                   |
| Aves | Non-Passer | Columbi | <i>Ocyphaps lophotes</i>          | 187.00  | 195.50 | Schleucher & Withers 2002    |
| Aves | Non-Passer | Columbi | <i>Oena capensis</i>              | 36.00   | 44.00  | Schleucher 2001              |
| Aves | Non-Passer | Columbi | <i>Pampusana beccarii</i>         | 68.80   | 96.00  | McNab, 2009                  |
| Aves | Non-Passer | Columbi | <i>Patagioenas leucocephala</i>   | 251.90  | 242.00 | McNab 2000                   |
| Aves | Non-Passer | Columbi | <i>Phaps chalcoptera</i>          | 304.00  | 275.00 | Schleucher & Withers 2002    |
| Aves | Non-Passer | Columbi | <i>Phaps elegans</i>              | 190.00  | 223.00 | Schleucher & Withers 2002    |
| Aves | Non-Passer | Columbi | <i>Phaps histrionica</i>          | 257.00  | 233.50 | Schleucher & Withers 2002    |
| Aves | Non-Passer | Columbi | <i>Ptilinopus melanospilus</i>    | 98.00   | 88.00  | Schleucher & Withers 2002    |
| Aves | Non-Passer | Columbi | <i>Ptilinopus perlatus</i>        | 196.00  | 191.00 | McNab 2000                   |
| Aves | Non-Passer | Columbi | <i>Ptilinopus superbus</i>        | 120.40  | 136.00 | Schleucher 2002              |
| Aves | Non-Passer | Columbi | <i>Spilopelia chinensis</i>       | 143.80  | 166.63 | Bushuev et al. (unpublished) |
| Aves | Non-Passer | Columbi | <i>Spilopelia senegalensis</i>    | 108.00  | 152.50 | Kendeigh et al. 1977         |
| Aves | Non-Passer | Columbi | <i>Streptopelia decaocto</i>      | 170.00  | 171.00 | Daan et al. 1990             |
| Aves | Non-Passer | Columbi | <i>Streptopelia roseogrisea</i>   | 150.00  | 159.00 | Benedict, Riddle, 1928       |
| Aves | Non-Passer | Columbi | <i>Streptopelia tranquebarica</i> | 96.37   | 125.65 | Bushuev et al. (unpublished) |
| Aves | Non-Passer | Columbi | <i>Streptopelia turtur</i>        | 154.00  | 205.00 | Kendeigh et al. 1977         |
| Aves | Non-Passer | Columbi | <i>Zenaidura macroura</i>         | 91.40   | 116.50 | Hudson & Brush 1964          |
| Aves | Non-Passer | Columbi | <i>Zentrygon frenata</i>          | 322.40  | 160.00 | Londono et al., 2015         |
| Aves | Non-Passer | Coracii | <i>Alcedo atthis</i>              | 24.10   | 46.82  | Bushuev et al. (unpublished) |
| Aves | Non-Passer | Coracii | <i>Alcedo atthis</i>              | 34.30   | 68.00  | Kendeigh et al. 1977         |
| Aves | Non-Passer | Coracii | <i>Alcedo meninting</i>           | 18.28   | 40.04  | Bushuev et al. (unpublished) |
| Aves | Non-Passer | Coracii | <i>Baryphthengus martii</i>       | 127.10  | 100.00 | Londono et al., 2015         |
| Aves | Non-Passer | Coracii | <i>Ceryle rudis</i>               | 70.30   | 103.21 | Bushuev et al. (unpublished) |
| Aves | Non-Passer | Coracii | <i>Ceyx erithaca</i>              | 12.89   | 30.33  | Bushuev et al. (unpublished) |
| Aves | Non-Passer | Coracii | <i>Chloroceryle aenea</i>         | 11.80   | 31.50  | Wiersma et al. 2007          |
| Aves | Non-Passer | Coracii | <i>Dacelo novaeguineae</i>        | 336.00  | 201.00 | Buttemer et al. 2003         |
| Aves | Non-Passer | Coracii | <i>Halcyon coromanda</i>          | 66.50   | 92.17  | Bushuev et al. (unpublished) |
| Aves | Non-Passer | Coracii | <i>Halcyon smyrnensis</i>         | 71.59   | 80.59  | Bushuev et al. (unpublished) |
| Aves | Non-Passer | Coracii | <i>Lacedo pulchella</i>           | 49.28   | 57.00  | Bushuev et al. (unpublished) |
| Aves | Non-Passer | Coracii | <i>Merops leschenaulti</i>        | 23.53   | 55.34  | Bushuev et al. (unpublished) |
| Aves | Non-Passer | Coracii | <i>Merops viridis</i>             | 33.80   | 53.50  | Bryant et al. 1984           |
| Aves | Non-Passer | Coracii | <i>Momotus aequatorialis</i>      | 158.50  | 105.45 | Londono et al., 2015         |
| Aves | Non-Passer | Coracii | <i>Momotus momota</i>             | 123.10  | 94.55  | Londono et al., 2015         |
| Aves | Non-Passer | Coracii | <i>Momotus momota</i>             | 102.40  | 88.50  | Wiersma et al. 2007          |
| Aves | Non-Passer | Coracii | <i>Nyctyornis athertoni</i>       | 89.32   | 117.86 | Bushuev et al. (unpublished) |
| Aves | Non-Passer | Coracii | <i>Pelargopsis capensis</i>       | 161.39  | 135.42 | Bushuev et al. (unpublished) |
| Aves | Non-Passer | Coracii | <i>Phoeniculus purpureus</i>      | 74.10   | 62.50  | Boix-Hinzen & Lovegrove 1998 |
| Aves | Non-Passer | Coracii | <i>Rhyticeros plicatus</i>        | 1781.60 | 816.50 | McNab 2001                   |
| Aves | Non-Passer | Coracii | <i>Todus mexicanus</i>            | 6.30    | 20.50  | Merola-Zwartjes & Ligon 2000 |
| Aves | Non-Passer | Coracii | <i>Upupa epops</i>                | 67.00   | 99.50  | Prinzinger & Hanssler 1980   |

|      |            |         |                                 |         |         |                              |
|------|------------|---------|---------------------------------|---------|---------|------------------------------|
| Aves | Non-Passer | Cuculi  | <i>Cacomantis merulinus</i>     | 24.63   | 41.73   | Bushuev et al. (unpublished) |
| Aves | Non-Passer | Cuculi  | <i>Cacomantis sonneratii</i>    | 31.30   | 54.07   | Bushuev et al. (unpublished) |
| Aves | Non-Passer | Cuculi  | <i>Cacomantis variolosus</i>    | 23.80   | 22.00   | Hails, 1983                  |
| Aves | Non-Passer | Cuculi  | <i>Centropus bengalensis</i>    | 104.50  | 101.96  | Bushuev et al. (unpublished) |
| Aves | Non-Passer | Cuculi  | <i>Centropus senegalensis</i>   | 175.00  | 271.50  | Prinzinger & Hanssler 1980   |
| Aves | Non-Passer | Cuculi  | <i>Centropus sinensis</i>       | 240.40  | 200.22  | Bushuev et al. (unpublished) |
| Aves | Non-Passer | Cuculi  | <i>Clamator coromandus</i>      | 54.80   | 57.41   | Bushuev et al. (unpublished) |
| Aves | Non-Passer | Cuculi  | <i>Cuculus canorus</i>          | 111.60  | 151.00  | Kendeigh et al. 1977         |
| Aves | Non-Passer | Cuculi  | <i>Eudynamys scolopaceus</i>    | 188.00  | 296.00  | Prinzinger & Hanssler 1980   |
| Aves | Non-Passer | Cuculi  | <i>Geococcyx californianus</i>  | 294.60  | 227.50  | Ohmart & Lasiewski 1971      |
| Aves | Non-Passer | Cuculi  | <i>Opisthocomus hoazin</i>      | 598.00  | 288.00  | Grajál 1991                  |
| Aves | Non-Passer | Cuculi  | <i>Phaenicophaeus tristis</i>   | 111.00  | 125.18  | Bushuev et al. (unpublished) |
| Aves | Non-Passer | Falconi | <i>Daptrius ater</i>            | 362.00  | 216.00  | Wasser 1986                  |
| Aves | Non-Passer | Falconi | <i>Falco mexicanus</i>          | 430.00  | 349.50  | Wasser 1986                  |
| Aves | Non-Passer | Falconi | <i>Falco sparverius</i>         | 116.00  | 119.00  | Wasser 1986                  |
| Aves | Non-Passer | Falconi | <i>Falco subbuteo</i>           | 208.00  | 233.50  | Kendeigh et al. 1977         |
| Aves | Non-Passer | Falconi | <i>Falco tinnunculus</i>        | 131.00  | 139.50  | Gavrilov & Dol'nik 1985      |
| Aves | Non-Passer | Falconi | <i>Micrastur gilvicolis</i>     | 170.50  | 189.09  | Londono et al., 2015         |
| Aves | Non-Passer | Falconi | <i>Micrastur ruficollis</i>     | 304.10  | 130.91  | Londono et al., 2015         |
| Aves | Non-Passer | Falconi | <i>Microhierax caerulescens</i> | 39.10   | 74.82   | Bushuev et al. (unpublished) |
| Aves | Non-Passer | Gabuli  | <i>Micromonacha lanceolata</i>  | 21.90   | 65.45   | Londono et al., 2015         |
| Aves | Non-Passer | Gabuli  | <i>Notharchus macrorhynchos</i> | 43.20   | 57.00   | Wiersma et al. 2007          |
| Aves | Non-Passer | Galli   | <i>Alectoris chukar</i>         | 475.00  | 353.00  | Marder & Bernstein 1983      |
| Aves | Non-Passer | Galli   | <i>Alectoris graeca</i>         | 633.00  | 456.00  | Kendeigh et al. 1977         |
| Aves | Non-Passer | Galli   | <i>Arborophila chloropus</i>    | 251.90  | 200.88  | Bushuev et al. (unpublished) |
| Aves | Non-Passer | Galli   | <i>Bonasa umbellus</i>          | 644.00  | 429.00  | Rasmussen, Brander, 1973     |
| Aves | Non-Passer | Galli   | <i>Callipepla californica</i>   | 137.10  | 138.00  | Hudson & Brush 1964          |
| Aves | Non-Passer | Galli   | <i>Callipepla gambelii</i>      | 126.10  | 136.00  | Weathers 1981                |
| Aves | Non-Passer | Galli   | <i>Colinus virginianus</i>      | 194.00  | 200.50  | Lasiewski, Dawson, 1967      |
| Aves | Non-Passer | Galli   | <i>Coturnix coturnix</i>        | 97.00   | 160.50  | Kendeigh et al. 1977         |
| Aves | Non-Passer | Galli   | <i>Coturnix japonica</i>        | 115.00  | 176.00  | Prinzinger & Hanssler 1980   |
| Aves | Non-Passer | Galli   | <i>Coturnix pectoralis</i>      | 95.80   | 114.50  | Roberts & Baudinette 1986    |
| Aves | Non-Passer | Galli   | <i>Crax alberti</i>             | 2800.00 | 1186.50 | Benedict, Fox, 1927          |
| Aves | Non-Passer | Galli   | <i>Dendragapus obscurus</i>     | 1131.00 | 892.50  | Pekins et al. 1992           |
| Aves | Non-Passer | Galli   | <i>Excalfactoria chinensis</i>  | 44.90   | 66.00   | Roberts & Baudinette 1986    |
| Aves | Non-Passer | Galli   | <i>Francolinus pintadeanus</i>  | 286.80  | 166.21  | Bushuev et al. (unpublished) |
| Aves | Non-Passer | Galli   | <i>Gallus gallus</i>            | 835.30  | 566.04  | Bushuev et al. (unpublished) |
| Aves | Non-Passer | Galli   | <i>Lagopus lagopus</i>          | 658.00  | 505.00  | Mortensen & Blix 1986        |
| Aves | Non-Passer | Galli   | <i>Lagopus leucura</i>          | 326.00  | 425.00  | Johnson 1968                 |
| Aves | Non-Passer | Galli   | <i>Lagopus muta</i>             | 465.00  | 493.00  | Mortensen & Blix 1986        |
| Aves | Non-Passer | Galli   | <i>Odontophorus stellatus</i>   | 296.50  | 209.09  | Londono et al., 2015         |
| Aves | Non-Passer | Galli   | <i>Penelope purpurascens</i>    | 2040.00 | 977.00  | Benedict, Fox, 1927          |
| Aves | Non-Passer | Galli   | <i>Perdix perdix</i>            | 501.00  | 387.50  | Kendeigh et al. 1977         |
| Aves | Non-Passer | Galli   | <i>Tetrao urogallus</i>         | 3900.00 | 2146.00 | Kendeigh et al. 1977         |
| Aves | Non-Passer | Grui    | <i>Amauorornis phoenicurus</i>  | 195.20  | 142.85  | Bushuev et al. (unpublished) |
| Aves | Non-Passer | Grui    | <i>Antigone canadensis</i>      | 3890.00 | 1465.50 | Benedict, Fox, 1927          |
| Aves | Non-Passer | Grui    | <i>Aramides cajaneus</i>        | 374.30  | 277.50  | McNab & Ellis 2006           |
| Aves | Non-Passer | Grui    | <i>Atlantisia rogersi</i>       | 39.40   | 40.50   | Ryan et al. 1989             |

|      |            |          |                                 |         |         |                              |
|------|------------|----------|---------------------------------|---------|---------|------------------------------|
| Aves | Non-Passer | Grui     | <i>Crex crex</i>                | 96.00   | 141.50  | Kendeigh et al. 1977         |
| Aves | Non-Passer | Grui     | <i>Fulica atra</i>              | 412.00  | 368.00  | Kendeigh et al. 1977         |
| Aves | Non-Passer | Grui     | <i>Gallinula tenebrosa</i>      | 512.40  | 421.00  | McNab & Ellis 2006           |
| Aves | Non-Passer | Grui     | <i>Gallirallus australis</i>    | 813.50  | 329.00  | McNab & Ellis 2006           |
| Aves | Non-Passer | Grui     | <i>Gallirallus owstoni</i>      | 198.80  | 165.00  | McNab & Ellis 2006           |
| Aves | Non-Passer | Grui     | <i>Gallirallus philippensis</i> | 171.70  | 175.50  | McNab & Ellis 2006           |
| Aves | Non-Passer | Grui     | <i>Grus paradisea</i>           | 4030.00 | 1919.00 | Benedict, Fox, 1927          |
| Aves | Non-Passer | Grui     | <i>Megacrex inepta</i>          | 856.60  | 241.50  | McNab & Ellis 2006           |
| Aves | Non-Passer | Grui     | <i>Porphyrio hochstetteri</i>   | 2758.30 | 1239.50 | McNab & Ellis 2006           |
| Aves | Non-Passer | Grui     | <i>Porphyrio porphyrio</i>      | 919.30  | 665.50  | McNab & Ellis 2006           |
| Aves | Non-Passer | Grui     | <i>Porzana cinerea</i>          | 47.90   | 89.00   | McNab & Ellis 2006           |
| Aves | Non-Passer | Grui     | <i>Tribonyx mortierii</i>       | 954.40  | 573.50  | McNab & Ellis 2006           |
| Aves | Non-Passer | Grui     | <i>Tribonyx ventralis</i>       | 309.20  | 290.50  | McNab & Ellis 2006           |
| Aves | Non-Passer | Grui     | <i>Turnix suscitator</i>        | 58.10   | 69.50   | Prinzinger et al. 1993       |
| Aves | Non-Passer | Pelecani | <i>Ardea herodias</i>           | 1870.00 | 1116.50 | Benedict, Fox, 1927          |
| Aves | Non-Passer | Pelecani | <i>Ardeola bacchus</i>          | 202.40  | 176.63  | Bushuev et al. (unpublished) |
| Aves | Non-Passer | Pelecani | <i>Botaurus lentiginosus</i>    | 600.00  | 488.50  | Benedict, Fox, 1927          |
| Aves | Non-Passer | Pelecani | <i>Bubulcus ibis</i>            | 299.20  | 237.00  | Ellis 1980                   |
| Aves | Non-Passer | Pelecani | <i>Egretta caerulea</i>         | 290.30  | 179.50  | Ellis 1980                   |
| Aves | Non-Passer | Pelecani | <i>Egretta thula</i>            | 314.00  | 244.50  | Ellis 1980                   |
| Aves | Non-Passer | Pelecani | <i>Egretta tricolor</i>         | 309.00  | 306.00  | Ellis 1980                   |
| Aves | Non-Passer | Pelecani | <i>Eudocimus albus</i>          | 940.00  | 741.50  | Benedict, Fox, 1927          |
|      |            |          | <i>Ixobrychus</i>               |         |         |                              |
| Aves | Non-Passer | Pelecani | <i>cinnamomeus</i>              | 121.60  | 115.26  | Bushuev et al. (unpublished) |
| Aves | Non-Passer | Pelecani | <i>Ixobrychus sinensis</i>      | 70.10   | 61.64   | Bushuev et al. (unpublished) |
| Aves | Non-Passer | Pelecani | <i>Pelecanus conspicillatus</i> | 5090.00 | 3262.50 | Benedict, Fox, 1927          |
| Aves | Non-Passer | Pelecani | <i>Pelecanus occidentalis</i>   | 3510.00 | 2303.00 | Benedict, Fox, 1927          |
|      |            | Phoenico |                                 |         |         |                              |
| Aves | Non-Passer | p        | <i>Phoenicopterus roseus</i>    | 3040.00 | 1875.50 | Benedict, Fox, 1927          |
| Aves | Non-Passer | Pici     | <i>Andigena hypoglaucha</i>     | 282.90  | 310.91  | Londono et al., 2015         |
|      |            |          | <i>Aulacorhynchus</i>           |         |         |                              |
| Aves | Non-Passer | Pici     | <i>prasinus</i>                 | 137.00  | 178.18  | Londono et al., 2015         |
|      |            |          | <i>Aulacorhynchus</i>           |         |         |                              |
| Aves | Non-Passer | Pici     | <i>prasinus</i>                 | 174.70  | 149.50  | McNab 2001                   |
|      |            |          | <i>Aulacorhynchus</i>           |         |         |                              |
| Aves | Non-Passer | Pici     | <i>sulcatus</i>                 | 131.70  | 122.00  | McNab 2001                   |
| Aves | Non-Passer | Pici     | <i>Bucco macrodactylus</i>      | 23.70   | 32.73   | Londono et al., 2015         |
| Aves | Non-Passer | Pici     | <i>Celeus loricatus</i>         | 83.10   | 123.50  | Wiersma et al. 2007          |
| Aves | Non-Passer | Pici     | <i>Celeus spectabilis</i>       | 113.00  | 178.18  | Londono et al., 2015         |
| Aves | Non-Passer | Pici     | <i>Chrysocolaptes lucidus</i>   | 146.45  | 185.23  | Bushuev et al. (unpublished) |
| Aves | Non-Passer | Pici     | <i>Colaptes rivolii</i>         | 81.50   | 169.09  | Londono et al., 2015         |
| Aves | Non-Passer | Pici     | <i>Dendrocopos major</i>        | 98.00   | 161.00  | Kendeigh et al. 1977         |
| Aves | Non-Passer | Pici     | <i>Dinopium javanense</i>       | 85.14   | 123.65  | Bushuev et al. (unpublished) |
| Aves | Non-Passer | Pici     | <i>Dryobates pubescens</i>      | 23.30   | 59.50   | Liknes & Swanson 1996        |
| Aves | Non-Passer | Pici     | <i>Galbula cyanescens</i>       | 24.00   | 41.82   | Londono et al., 2015         |
| Aves | Non-Passer | Pici     | <i>Gecinulus grantia</i>        | 72.10   | 104.16  | Bushuev et al. (unpublished) |
| Aves | Non-Passer | Pici     | <i>Hemicircus canente</i>       | 41.05   | 77.98   | Bushuev et al. (unpublished) |
| Aves | Non-Passer | Pici     | <i>Jynx torquilla</i>           | 31.80   | 64.50   | Kendeigh et al. 1977         |
| Aves | Non-Passer | Pici     | <i>Malacoptila fulvogularis</i> | 49.60   | 96.36   | Londono et al., 2015         |
| Aves | Non-Passer | Pici     | <i>Malacoptila semicincta</i>   | 47.10   | 60.00   | Londono et al., 2015         |
|      |            |          | <i>Melanerpes</i>               |         |         |                              |
| Aves | Non-Passer | Pici     | <i>rubricapillus</i>            | 48.70   | 96.50   | Wiersma et al. 2007          |

|      |            |                 |                                       |         |         |                                            |
|------|------------|-----------------|---------------------------------------|---------|---------|--------------------------------------------|
| Aves | Non-Passer | Pici            | <i>Micropternus<br/>brachyurus</i>    | 79.37   | 114.30  | Bushuev et al. (unpublished)               |
| Aves | Non-Passer | Pici            | <i>Monasa morphoeus</i>               | 67.50   | 81.82   | Londono et al., 2015                       |
| Aves | Non-Passer | Pici            | <i>Monasa nigrifrons</i>              | 86.00   | 83.64   | Londono et al., 2015                       |
| Aves | Non-Passer | Pici            | <i>Picumnus rufiventris</i>           | 21.90   | 47.27   | Londono et al., 2015                       |
| Aves | Non-Passer | Pici            | <i>Picus canus</i>                    | 152.13  | 183.98  | Bushuev et al. (unpublished)               |
| Aves | Non-Passer | Pici            | <i>Picus chlorolophus</i>             | 62.00   | 91.06   | Bushuev et al. (unpublished)               |
| Aves | Non-Passer | Pici            | <i>Picus vittatus</i>                 | 119.75  | 155.55  | Bushuev et al. (unpublished)               |
| Aves | Non-Passer | Pici            | <i>Psilopogon australis</i>           | 28.30   | 61.70   | Bushuev et al. (unpublished)               |
| Aves | Non-Passer | Pici            | <i>Psilopogon faiostriatus</i>        | 75.30   | 166.85  | Bushuev et al. (unpublished)               |
| Aves | Non-Passer | Pici            | <i>Psilopogon lineatus</i>            | 116.70  | 131.65  | Bushuev et al. (unpublished)               |
| Aves | Non-Passer | Pici            | <i>Pteroglossus aracari</i>           | 200.70  | 160.00  | McNab 2001                                 |
| Aves | Non-Passer | Pici            | <i>Pteroglossus bailloni</i>          | 133.00  | 126.50  | McNab 2001                                 |
| Aves | Non-Passer | Pici            | <i>Ramphastos dicolorus</i>           | 328.90  | 227.50  | McNab 2001                                 |
| Aves | Non-Passer | Pici            | <i>Ramphastos toco</i>                | 582.00  | 436.00  | McNab 2001                                 |
| Aves | Non-Passer | Pici            | <i>Ramphastos tucanus</i>             | 420.30  | 307.50  | McNab 2001                                 |
| Aves | Non-Passer | Pici            | <i>Sasia ochracea</i>                 | 8.35    | 33.59   | Bushuev et al. (unpublished)               |
| Aves | Non-Passer | Pici            | <i>Selenidera reinwardtii</i>         | 173.60  | 218.18  | Londono et al., 2015                       |
| Aves | Non-Passer | Pici            | <i>Trachyphonus darnaudii</i>         | 36.60   | 39.50   | McNab 2001                                 |
| Aves | Non-Passer | Pici            | <i>Veniliornis nigriceps</i>          | 43.40   | 89.09   | Londono et al., 2015                       |
| Aves | Non-Passer | Podicape<br>di  | <i>Podiceps nigricollis</i>           | 317.00  | 385.50  | Ellis & Jehl 2003                          |
| Aves | Non-Passer | Procellari<br>i | <i>Aphrodroma brevirostris</i>        | 315.00  | 319.00  | Brown & Adams 1984                         |
| Aves | Non-Passer | Procellari<br>i | <i>Diomedea exulans</i>               | 8130.00 | 3658.50 | Brown & Adams 1984                         |
| Aves | Non-Passer | Procellari<br>i | <i>Fulmarus glacialis</i>             | 728.00  | 687.50  | Bryant & Furness 1995                      |
| Aves | Non-Passer | Procellari<br>i | <i>Halobaena caerulea</i>             | 191.00  | 319.00  | Brown 1988                                 |
| Aves | Non-Passer | Procellari<br>i | <i>Macronectes giganteus</i>          | 4780.00 | 2404.00 | Brown & Adams 1984                         |
| Aves | Non-Passer | Procellari<br>i | <i>Oceanodroma furcata</i>            | 44.60   | 79.50   | Vleck & Kenagy 1980                        |
| Aves | Non-Passer | Procellari<br>i | <i>Oceanodroma leucorhoa</i>          | 42.00   | 110.50  | Iversen, Krog, 1972; Ricklefs et al., 1980 |
| Aves | Non-Passer | Procellari<br>i | <i>Pelecanoides georgicus</i>         | 127.00  | 177.00  | Adams, Brown, 1984                         |
| Aves | Non-Passer | Procellari<br>i | <i>Phoebastria immutabilis</i>        | 2522.00 | 1345.00 | Grant, Whittow, 1983                       |
| Aves | Non-Passer | Procellari<br>i | <i>Phoebetria fusca</i>               | 2875.00 | 1489.50 | Adams & Brown 1984                         |
| Aves | Non-Passer | Procellari<br>i | <i>Procellaria<br/>aequinoctialis</i> | 1287.00 | 1135.50 | Brown & Adams 1984                         |
| Aves | Non-Passer | Procellari<br>i | <i>Procellaria cinerea</i>            | 1014.00 | 902.00  | Brown & Adams 1984                         |
| Aves | Non-Passer | Procellari<br>i | <i>Pterodroma hypoleuca</i>           | 169.00  | 228.00  | Grant, Whittow, 1983                       |
| Aves | Non-Passer | Procellari<br>i | <i>Pterodroma macroptera</i>          | 479.00  | 485.50  | Brown 1988                                 |
| Aves | Non-Passer | Procellari<br>i | <i>Pterodroma mollis</i>              | 274.00  | 314.50  | Adams & Brown 1984                         |
| Aves | Non-Passer | Procellari<br>i | <i>Puffinus puffinus</i>              | 367.00  | 419.00  | Bryant & Furness 1995                      |
| Aves | Non-Passer | Procellari<br>i | <i>Thalassarche<br/>chrysostoma</i>   | 3753.00 | 1531.50 | Adams & Brown 1984                         |
| Aves | Non-Passer | Psittaci        | <i>Agapornis fischeri</i>             | 56.70   | 95.00   | Gavrilov & Dol'nik 1985                    |
| Aves | Non-Passer | Psittaci        | <i>Agapornis roseicollis</i>          | 48.10   | 83.50   | Kendeigh et al. 1977                       |



|      |            |           |                               |          |         |                                |
|------|------------|-----------|-------------------------------|----------|---------|--------------------------------|
| Aves | Non-Passer | Psittaci  | <i>Barnardius zonarius</i>    | 131.80   | 142.50  | Williams et al. 1991           |
| Aves | Non-Passer | Psittaci  | <i>Bolborhynchus lineola</i>  | 54.50    | 106.50  | Bucher, 1981                   |
|      |            |           | <i>Bolborhynchus</i>          |          |         |                                |
| Aves | Non-Passer | Psittaci  | <i>orbygnesi</i>              | 46.40    | 69.09   | Londono et al., 2015           |
| Aves | Non-Passer | Psittaci  | <i>Brotogeris jugularis</i>   | 63.50    | 103.50  | Wiersma et al. 2007            |
| Aves | Non-Passer | Psittaci  | <i>Cyanoramphus auriceps</i>  | 52.90    | 88.50   | McNab & Salisbury 1995         |
|      |            |           | <i>Cyanoramphus</i>           |          |         |                                |
| Aves | Non-Passer | Psittaci  | <i>novaezelandiae</i>         | 56.10    | 112.00  | McNab & Salisbury 1995         |
| Aves | Non-Passer | Psittaci  | <i>Cyanoramphus unicolor</i>  | 129.40   | 194.50  | McNab & Salisbury 1995         |
| Aves | Non-Passer | Psittaci  | <i>Loriculus galgulus</i>     | 27.00    | 93.00   | Prinzinger & Hanssler 1980     |
| Aves | Non-Passer | Psittaci  | <i>Loriculus vernalis</i>     | 26.70    | 58.45   | Bushuev et al. (unpublished)   |
|      |            |           | <i>Melopsittacus</i>          |          |         |                                |
| Aves | Non-Passer | Psittaci  | <i>undulatus</i>              | 33.70    | 66.50   | Weathers & Schoenbaechler 1976 |
| Aves | Non-Passer | Psittaci  | <i>Myiopsitta monachus</i>    | 80.40    | 94.50   | Weathers & Caccamise 1978      |
| Aves | Non-Passer | Psittaci  | <i>Neophema petrophila</i>    | 48.40    | 114.00  | Williams et al. 1991           |
| Aves | Non-Passer | Psittaci  | <i>Neophema pulchella</i>     | 40.00    | 104.50  | Prinzinger & Hanssler 1980     |
| Aves | Non-Passer | Psittaci  | <i>Neopsephotus bourkii</i>   | 40.00    | 97.00   | Prinzinger & Hanssler 1980     |
| Aves | Non-Passer | Psittaci  | <i>Psittacula alexandri</i>   | 114.80   | 151.17  | Bushuev et al. (unpublished)   |
|      |            |           | <i>Trichoglossus</i>          |          |         |                                |
| Aves | Non-Passer | Psittaci  | <i>haematodus</i>             | 137.10   | 215.00  | Williams et al. 1991           |
| Aves | Non-Passer | Pteroclid | <i>Pterocles orientalis</i>   | 386.40   | 350.50  | Hinsley et al. 1993            |
| Aves | Non-Passer | Sphenisci | <i>Aptenodytes forsteri</i>   | 23370.00 | 7709.50 | Pinshow et al. 1976            |
|      |            |           | <i>Aptenodytes</i>            |          |         |                                |
| Aves | Non-Passer | Sphenisci | <i>patagonicus</i>            | 11080.00 | 3933.50 | Gavrilov 1977                  |
| Aves | Non-Passer | Sphenisci | <i>Eudyptes chrysocome</i>    | 2330.00  | 1050.00 | Gavrilov 1977; Brown 1984      |
| Aves | Non-Passer | Sphenisci | <i>Eudyptes chrysolophus</i>  | 3870.00  | 1556.50 | Gavrilov 1977; Brown 1984      |
|      |            |           | <i>Eudyptes</i>               |          |         |                                |
| Aves | Non-Passer | Sphenisci | <i>pachyrhynchus</i>          | 2600.00  | 1246.00 | Drent & Stonehouse 1971        |
| Aves | Non-Passer | Sphenisci | <i>Eudyptula minor</i>        | 1100.00  | 574.50  | Baudinette et al. 1986         |
| Aves | Non-Passer | Sphenisci | <i>Eudyptula minor</i>        | 1150.00  | 1190.50 | Pinshow et al., 1977           |
| Aves | Non-Passer | Sphenisci | <i>Megadyptes antipodes</i>   | 4800.00  | 2072.50 | Drent & Stonehouse 1971        |
| Aves | Non-Passer | Sphenisci | <i>Pygoscelis adeliae</i>     | 3970.00  | 2202.00 | Kooyman et al. 1976            |
| Aves | Non-Passer | Sphenisci | <i>Pygoscelis papua</i>       | 5775.00  | 5950.50 | Scholander et al.,1940         |
| Aves | Non-Passer | Sphenisci | <i>Spheniscus humboldti</i>   | 3870.00  | 1707.00 | Drent & Stonehouse 1971        |
| Aves | Non-Passer | Strigi    | <i>Aegolius acadicus</i>      | 118.10   | 112.50  | Ligon 1969                     |
| Aves | Non-Passer | Strigi    | <i>Aegolius funereus</i>      | 130.00   | 203.50  | Hohtola et al. 1994            |
| Aves | Non-Passer | Strigi    | <i>Asio flammeus</i>          | 406.00   | 309.50  | Graber, 1962                   |
| Aves | Non-Passer | Strigi    | <i>Asio otus</i>              | 252.00   | 171.50  | Wijnandts 1984                 |
| Aves | Non-Passer | Strigi    | <i>Athene cunicularia</i>     | 146.70   | 140.00  | Coulombe 1970                  |
| Aves | Non-Passer | Strigi    | <i>Athene cunicularia</i>     | 132.40   | 139.50  | Coulombe, 1970                 |
| Aves | Non-Passer | Strigi    | <i>Bubo scandiacus</i>        | 2026.00  | 592.00  | Gessaman 1972                  |
| Aves | Non-Passer | Strigi    | <i>Bubo virginianus</i>       | 1000.00  | 781.00  | Ganey et al. 1993              |
| Aves | Non-Passer | Strigi    | <i>Glaucidium brasilianum</i> | 60.60    | 78.18   | Londono et al., 2015           |
| Aves | Non-Passer | Strigi    | <i>Glaucidium cuculoides</i>  | 129.90   | 99.31   | Bushuev et al. (unpublished)   |
| Aves | Non-Passer | Strigi    | <i>Glaucidium cuculoides</i>  | 163.00   | 156.50  | Johnson,Collins, 1975          |
| Aves | Non-Passer | Strigi    | <i>Glaucidium gnoma</i>       | 52.00    | 83.50   | Ligon 1969                     |
| Aves | Non-Passer | Strigi    | <i>Glaucidium jardinii</i>    | 60.60    | 123.64  | Londono et al., 2015           |
| Aves | Non-Passer | Strigi    | <i>Megascops asio</i>         | 165.50   | 108.00  | Ligon 1969                     |
| Aves | Non-Passer | Strigi    | <i>Megascops trichopsis</i>   | 99.80    | 75.00   | Ligon 1969                     |
| Aves | Non-Passer | Strigi    | <i>Micrathene whitneyi</i>    | 45.00    | 45.50   | Ligon 1968                     |
| Aves | Non-Passer | Strigi    | <i>Ninox scutulata</i>        | 187.45   | 166.38  | Bushuev et al. (unpublished)   |
| Aves | Non-Passer | Strigi    | <i>Ninox theomacha</i>        | 151.40   | 188.50  | McNab, pers. obs.              |
| Aves | Non-Passer | Strigi    | <i>Otus lettia</i>            | 108.90   | 102.41  | Bushuev et al. (unpublished)   |

|      |               |         |                                       |         |         |                              |
|------|---------------|---------|---------------------------------------|---------|---------|------------------------------|
| Aves | Non-Passer    | Strigi  | <i>Otus scops</i>                     | 78.90   | 85.00   | Gavrilov & Dol'nik 1985      |
| Aves | Non-Passer    | Strigi  | <i>Otus sunia</i>                     | 76.70   | 74.48   | Bushuev et al. (unpublished) |
| Aves | Non-Passer    | Strigi  | <i>Strix aluco</i>                    | 520.00  | 375.00  | Herzog, 1930                 |
| Aves | Non-Passer    | Strigi  | <i>Strix occidentalis</i>             | 571.00  | 481.50  | Ganey et al. 1993            |
| Aves | Non-Passer    | Strigi  | <i>Surnia ulula</i>                   | 333.00  | 306.50  | Johnson, Collins, 1975       |
| Aves | Non-Passer    | Strigi  | <i>Tyto alba</i>                      | 533.20  | 323.00  | Edwards 1987                 |
| Aves | Non-Passer    | Strigi  | <i>Tyto tenebricosa</i>               | 770.00  | 518.00  | McNab, 2009                  |
| Aves | Non-Passer    | Strigi  | <i>Uroglaux dimorpha</i>              | 245.30  | 263.50  | McNab, 2009.                 |
| Aves | Non-Passer    | Suli    | <i>Anhinga anhinga</i>                | 1040.00 | 574.50  | Hennemann 1983               |
| Aves | Non-Passer    | Suli    | <i>Fregata magnificens</i>            | 1080.00 | 501.00  | Enger, 1957                  |
| Aves | Non-Passer    | Suli    | <i>Leucocorax atriceps</i>            | 2600.00 | 2693.50 | Ricklefs, Matthew, 1983      |
| Aves | Non-Passer    | Suli    | <i>Morus bassanus</i>                 | 2574.00 | 2248.00 | Bryant & Furness 1995        |
| Aves | Non-Passer    | Suli    | <i>Phalacrocorax aristotelis</i>      | 1619.00 | 1539.50 | Bryant & Furness 1995        |
| Aves | Non-Passer    | Suli    | <i>Phalacrocorax auritus</i>          | 1330.00 | 988.50  | Hennemann 1983               |
| Aves | Non-Passer    | Trogoni | <i>Harpactes oreskios</i>             | 51.37   | 89.47   | Bushuev et al. (unpublished) |
| Aves | Non-Passer    | Trogoni | <i>Trogon personatus</i>              | 59.00   | 150.91  | Londono et al., 2015         |
| Aves | Non-Passer    | Trogoni | <i>Trogon rufus</i>                   | 53.00   | 77.50   | Yarbrough, 1971              |
| Aves | Passeriformes | Passeri | <i>Abroscopus superciliaris</i>       | 6.71    | 26.68   | Bushuev et al. (unpublished) |
| Aves | Passeriformes | Passeri | <i>Acanthagenys rufogularis</i>       | 43.40   | 114.00  | Bech et al., 2016            |
| Aves | Passeriformes | Passeri | <i>Acanthis flammea</i>               | 14.70   | 62.50   | Reinertsen & Haftorn 1986    |
| Aves | Passeriformes | Passeri | <i>Acanthiza chrysorrhoa</i>          | 8.30    | 40.20   | Bech et al., 2016            |
| Aves | Passeriformes | Passeri | <i>Acanthiza lineata</i>              | 7.30    | 28.80   | Bech et al., 2016            |
| Aves | Passeriformes | Passeri | <i>Acanthiza pusilla</i>              | 6.40    | 40.20   | Bech et al., 2016            |
| Aves | Passeriformes | Passeri | <i>Acanthiza uropygialis</i>          | 6.60    | 31.80   | Bech et al., 2016            |
| Aves | Passeriformes | Passeri | <i>Acanthorhynchus tenuirostris</i>   | 11.30   | 49.80   | Bech et al., 2016            |
| Aves | Passeriformes | Passeri | <i>Acridotheres cristatellus</i>      | 109.40  | 217.50  | Gohnson, McTaggart, 1975     |
| Aves | Passeriformes | Passeri | <i>Acridotheres tristis</i>           | 102.30  | 159.00  | Bech et al., 2016            |
| Aves | Passeriformes | Passeri | <i>Acrocephalus arundinaceus</i>      | 21.90   | 46.00   | Hails, 1983                  |
| Aves | Passeriformes | Passeri | <i>Acrocephalus bistrigiceps</i>      | 7.01    | 28.67   | Bushuev et al. (unpublished) |
| Aves | Passeriformes | Passeri | <i>Acrocephalus bistrigiceps</i>      | 7.90    | 23.00   | Hails, 1983                  |
| Aves | Passeriformes | Passeri | <i>Acrocephalus palustris</i>         | 10.80   | 36.50   | Kendeigh et al. 1977         |
| Aves | Passeriformes | Passeri | <i>Acrocephalus schoenobaenus</i>     | 11.50   | 39.00   | Kendeigh et al. 1977         |
| Aves | Passeriformes | Passeri | <b><i>Acrocephalus orientalis</i></b> | 20.79   | 46.01   | Bushuev et al. (unpublished) |
| Aves | Passeriformes | Passeri | <i>Aegithalos caudatus</i>            | 8.90    | 36.00   | Gavrilov & Dol'nik 1985      |
| Aves | Passeriformes | Passeri | <i>Aegithina lafresnayei</i>          | 18.22   | 44.51   | Bushuev et al. (unpublished) |
| Aves | Passeriformes | Passeri | <i>Aegithina tiphia</i>               | 12.05   | 29.09   | Bushuev et al. (unpublished) |
| Aves | Passeriformes | Passeri | <i>Aethomyias papuensis</i>           | 10.40   | 33.00   | McNab, 2009                  |
| Aves | Passeriformes | Passeri | <i>Aethomyias perspicillatus</i>      | 8.80    | 39.00   | McNab, 2009                  |
| Aves | Passeriformes | Passeri | <i>Aethopyga christinae</i>           | 5.20    | 24.00   | Prinzinger et al. 1989       |
| Aves | Passeriformes | Passeri | <i>Aethopyga siparaja</i>             | 6.16    | 24.97   | Bushuev et al. (unpublished) |
| Aves | Passeriformes | Passeri | <i>Aethopyga siparaja</i>             | 6.80    | 26.50   | Prinzinger et al. 1989       |
| Aves | Passeriformes | Passeri | <i>Agelaius phoeniceus</i>            | 43.10   | 87.00   | Weathers 1981                |
| Aves | Passeriformes | Passeri | <i>Akletos goeldii</i>                | 42.40   | 76.36   | Londono et al., 2015         |
| Aves | Passeriformes | Passeri | <i>Alaemon alaudipes</i>              | 37.70   | 77.00   | Tieleman et al. 2002         |
| Aves | Passeriformes | Passeri | <i>Alauda arvensis</i>                | 31.70   | 130.00  | Tieleman et al. 2002         |
| Aves | Passeriformes | Passeri | <i>Alcippe grotei</i>                 | 15.40   | 67.55   | Bushuev et al. (unpublished) |

|      |               |         |                                    |        |        |                              |
|------|---------------|---------|------------------------------------|--------|--------|------------------------------|
| Aves | Passeriformes | Passeri | <i>Aleadryas rufinucha</i>         | 38.60  | 75.00  | McNab, pers. obs.            |
| Aves | Passeriformes | Passeri | <i>Alophoixus bres</i>             | 35.00  | 64.00  | Hails, 1983                  |
| Aves | Passeriformes | Passeri | <i>Alophoixus ochraceus</i>        | 34.18  | 68.44  | Bushuev et al. (unpublished) |
| Aves | Passeriformes | Passeri | <i>Amadina erythrocephala</i>      | 21.70  | 38.00  | McKechnie & Lovegrove 2003   |
| Aves | Passeriformes | Passeri | <i>Amadina fasciata</i>            | 17.20  | 38.50  | Marschall & Prinzinger 1991  |
| Aves | Passeriformes | Passeri | <i>Amblycercus holosericeus</i>    | 50.40  | 103.64 | Londono et al., 2015         |
| Aves | Passeriformes | Passeri | <i>Ammodramus aurifrons</i>        | 16.40  | 47.27  | Londono et al., 2015         |
| Aves | Passeriformes | Passeri | <i>Ammodramus savannarum</i>       | 13.80  | 32.00  | Yarbrough 1971               |
| Aves | Passeriformes | Passeri | <i>Amphispiza bilineata</i>        | 11.60  | 35.50  | Weathers 1981                |
| Aves | Passeriformes | Passeri | <i>Anabacerthia striaticollis</i>  | 24.20  | 63.64  | Londono et al., 2015         |
| Aves | Passeriformes | Passeri | <i>Anabazenops dorsalis</i>        | 39.20  | 81.82  | Londono et al., 2015         |
| Aves | Passeriformes | Passeri | <i>Anairetes parulus</i>           | 6.60   | 27.27  | Londono et al., 2015         |
| Aves | Passeriformes | Passeri | <i>Ancistrops strigilatus</i>      | 36.00  | 40.00  | Londono et al., 2015         |
| Aves | Passeriformes | Passeri | <i>Anisognathus igniventris</i>    | 35.00  | 80.00  | Londono et al., 2015         |
| Aves | Passeriformes | Passeri | <i>Anthreptes orientalis</i>       | 11.80  | 27.50  | Prinzinger et al. 1989       |
| Aves | Passeriformes | Passeri | <i>Anthus campestris</i>           | 21.80  | 69.00  | Kendeigh et al. 1977         |
| Aves | Passeriformes | Passeri | <i>Anthus pratensis</i>            | 18.90  | 54.00  | Kendeigh et al. 1977         |
| Aves | Passeriformes | Passeri | <i>Anthus rufulus</i>              | 20.10  | 52.50  | Bushuev et al. (unpublished) |
| Aves | Passeriformes | Passeri | <i>Anthus trivialis</i>            | 19.70  | 61.00  | Kendeigh et al. 1977         |
| Aves | Passeriformes | Passeri | <i>Arachnothera flavigaster</i>    | 36.30  | 54.00  | Hails, 1983                  |
| Aves | Passeriformes | Passeri | <i>Arachnothera longirostra</i>    | 11.19  | 36.72  | Bushuev et al. (unpublished) |
| Aves | Passeriformes | Passeri | <i>Arachnothera longirostra</i>    | 13.00  | 34.00  | Hails, 1983                  |
| Aves | Passeriformes | Passeri | <i>Arremon castaneiceps</i>        | 35.70  | 96.36  | Londono et al., 2015         |
| Aves | Passeriformes | Passeri | <i>Arremon taciturnus</i>          | 27.70  | 76.36  | Londono et al., 2015         |
| Aves | Passeriformes | Passeri | <i>Arremon torquatus</i>           | 42.80  | 85.45  | Londono et al., 2015         |
| Aves | Passeriformes | Passeri | <i>Arremonops conirostris</i>      | 39.70  | 81.50  | Wiersma et al. 2007          |
| Aves | Passeriformes | Passeri | <i>Artamus maximus</i>             | 60.00  | 99.50  | McNab, pers. obs.            |
| Aves | Passeriformes | Passeri | <i>Arundinax aedon</i>             | 19.35  | 63.26  | Bushuev et al. (unpublished) |
| Aves | Passeriformes | Passeri | <i>Asthenes helleri</i>            | 15.00  | 34.55  | Londono et al., 2015         |
| Aves | Passeriformes | Passeri | <i>Astrapia stephaniae</i>         | 148.20 | 290.00 | McNab 2005                   |
| Aves | Passeriformes | Passeri | <i>Atlapetes melanolaemus</i>      | 25.50  | 61.82  | Londono et al., 2015         |
| Aves | Passeriformes | Passeri | <i>Attila spadiceus</i>            | 32.70  | 25.45  | Londono et al., 2015         |
| Aves | Passeriformes | Passeri | <i>Auriparus flaviceps</i>         | 6.80   | 29.50  | Goldstein, 1974              |
| Aves | Passeriformes | Passeri | <i>Automolus melanopezus</i>       | 31.60  | 69.09  | Londono et al., 2015         |
| Aves | Passeriformes | Passeri | <i>Automolus ochrolaemus</i>       | 36.70  | 114.55 | Londono et al., 2015         |
| Aves | Passeriformes | Passeri | <i>Automolus rufipileatus</i>      | 36.20  | 83.64  | Londono et al., 2015         |
| Aves | Passeriformes | Passeri | <i>Automolus subulatus</i>         | 30.20  | 89.09  | Londono et al., 2015         |
| Aves | Passeriformes | Passeri | <i>Basileuterus tristriatus</i>    | 12.60  | 45.45  | Londono et al., 2015         |
| Aves | Passeriformes | Passeri | <i>Bombycilla garrulus</i>         | 72.50  | 171.50 | Kendeigh et al. 1977         |
| Aves | Passeriformes | Passeri | <i>Buthraupis montana</i>          | 89.70  | 185.45 | Londono et al., 2015         |
| Aves | Passeriformes | Passeri | <i>Cacicus chrysonotus</i>         | 94.00  | 154.55 | Londono et al., 2015         |
| Aves | Passeriformes | Passeri | <i>Calamospiza melanocorys</i>     | 33.00  | 79.00  | Wunder, 1979                 |
| Aves | Passeriformes | Passeri | <i>Calendulauda erythrochlamys</i> | 27.30  | 75.00  | Williams 1999                |
| Aves | Passeriformes | Passeri | <i>Calliope calliope</i>           | 18.34  | 50.42  | Bushuev et al. (unpublished) |
| Aves | Passeriformes | Passeri | <i>Camptostoma obsoletum</i>       | 12.50  | 47.50  | Wiersma et al. 2007          |
| Aves | Passeriformes | Passeri | <i>Cantorchilus leucotis</i>       | 18.00  | 38.00  | Wiersma et al. 2007          |

|      |               |         |                                      |       |        |                              |
|------|---------------|---------|--------------------------------------|-------|--------|------------------------------|
| Aves | Passeriformes | Passeri | <i>Cardinalis cardinalis</i>         | 41.00 | 90.50  | Hinds & Calder 1973          |
| Aves | Passeriformes | Passeri | <i>Cardinalis sinuatus</i>           | 32.00 | 70.50  | Hinds & Calder 1973          |
| Aves | Passeriformes | Passeri | <i>Carduelis carduelis</i>           | 16.50 | 62.50  | Kendeigh et al. 1977         |
| Aves | Passeriformes | Passeri | <i>Carpodacus erythrinus</i>         | 21.20 | 66.50  | Kendeigh et al. 1977         |
| Aves | Passeriformes | Passeri | <i>Catamblyrhynchus diadema</i>      | 17.00 | 45.45  | Londono et al., 2015         |
| Aves | Passeriformes | Passeri | <i>Catharus dryas</i>                | 35.90 | 83.64  | Londono et al., 2015         |
| Aves | Passeriformes | Passeri | <i>Catharus fuscescens</i>           | 28.00 | 90.50  | Holmes, Sawyer, 1975         |
| Aves | Passeriformes | Passeri | <i>Catharus guttatus</i>             | 27.80 | 85.50  | Holmes, Sawyer, 1975         |
| Aves | Passeriformes | Passeri | <i>Catharus minimus</i>              | 24.80 | 82.50  | Holmes, Sawyer, 1975         |
| Aves | Passeriformes | Passeri | <i>Catharus ustulatus</i>            | 27.90 | 84.00  | Holmes, Sawyer, 1975         |
| Aves | Passeriformes | Passeri | <i>Ceratopipra chloromeros</i>       | 16.20 | 52.73  | Londono et al., 2015         |
| Aves | Passeriformes | Passeri | <i>Ceratopipra mentalis</i>          | 12.30 | 35.00  | Bartholomew et al. 1983      |
| Aves | Passeriformes | Passeri | <i>Cercomacroides tyrannina</i>      | 15.40 | 34.00  | Wiersma et al. 2007          |
| Aves | Passeriformes | Passeri | <i>Chalcomitra adelberti</i>         | 9.50  | 31.50  | Prinzinger et al. 1989       |
| Aves | Passeriformes | Passeri | <i>Chalcomitra amethystina</i>       | 10.00 | 31.50  | Prinzinger et al. 1989       |
| Aves | Passeriformes | Passeri | <i>Chalcomitra rubescens</i>         | 10.00 | 33.00  | Seavy 2006                   |
| Aves | Passeriformes | Passeri | <i>Chalcomitra senegalensis</i>      | 13.70 | 43.00  | Seavy 2006                   |
| Aves | Passeriformes | Passeri | <i>Chalcoparia singalensis</i>       | 7.34  | 26.22  | Bushuev et al. (unpublished) |
| Aves | Passeriformes | Passeri | <i>Chiroxiphia boliviana</i>         | 17.00 | 54.55  | Londono et al., 2015         |
| Aves | Passeriformes | Passeri | <i>Chiroxiphia lanceolata</i>        | 18.40 | 61.00  | Wiersma et al. 2007          |
| Aves | Passeriformes | Passeri | <i>Chloris chloris</i>               | 28.20 | 85.50  | Kendeigh et al. 1977         |
| Aves | Passeriformes | Passeri | <i>Chlorochrysa calliparaea</i>      | 16.90 | 45.45  | Londono et al., 2015         |
| Aves | Passeriformes | Passeri | <i>Chlorodrepanis virens</i>         | 15.30 | 53.00  | MacMillen, 1974              |
| Aves | Passeriformes | Passeri | <i>Chlorodrepanis virens</i>         | 10.70 | 37.50  | MacMillen, 1981              |
| Aves | Passeriformes | Passeri | <i>Chloropsis aurifrons</i>          | 27.90 | 62.60  | Bushuev et al. (unpublished) |
| Aves | Passeriformes | Passeri | <i>Chloropsis cochinchinensis</i>    | 21.20 | 47.58  | Bushuev et al. (unpublished) |
| Aves | Passeriformes | Passeri | <i>Chloropsis sonnerati</i>          | 39.70 | 68.00  | Hails, 1983                  |
| Aves | Passeriformes | Passeri | <i>Chlorornis riefferii</i>          | 49.80 | 92.73  | Londono et al., 2015         |
| Aves | Passeriformes | Passeri | <i>Chlorospingus flavigularis</i>    | 26.50 | 60.00  | Londono et al., 2015         |
| Aves | Passeriformes | Passeri | <i>Chlorospingus parvirostris</i>    | 23.10 | 60.00  | Londono et al., 2015         |
| Aves | Passeriformes | Passeri | <i>Cicinnurus regius</i>             | 54.00 | 105.00 | McNab 2005                   |
| Aves | Passeriformes | Passeri | <i>Cinclus mexicanus</i>             | 50.20 | 83.00  | Murrish, 1970                |
| Aves | Passeriformes | Passeri | <i>Cinnycerthia fulva</i>            | 16.30 | 36.36  | Londono et al., 2015         |
| Aves | Passeriformes | Passeri | <i>Cinnyris bifasciatus</i>          | 6.20  | 16.50  | Prinzinger et al. 1989       |
| Aves | Passeriformes | Passeri | <i>Cinnyris chloropygius</i>         | 6.80  | 25.00  | Seavy 2006                   |
| Aves | Passeriformes | Passeri | <i>Cinnyris cupreus</i>              | 9.00  | 29.50  | Seavy 2006                   |
| Aves | Passeriformes | Passeri | <i>Cinnyris jugularis</i>            | 5.87  | 23.71  | Bushuev et al. (unpublished) |
| Aves | Passeriformes | Passeri | <i>Cinnyris venustus</i>             | 7.10  | 25.00  | Prinzinger et al. 1989       |
| Aves | Passeriformes | Passeri | <i>Cissopis leverianus</i>           | 61.40 | 50.91  | Londono et al., 2015         |
| Aves | Passeriformes | Passeri | <i>Cnemophilus loriae</i>            | 78.10 | 119.00 | McNab 2005                   |
| Aves | Passeriformes | Passeri | <i>Cnemophilus macgregorii</i>       | 89.00 | 134.00 | McNab, pers. obs.            |
| Aves | Passeriformes | Passeri | <i>Cnipodectes subbrunneus</i>       | 20.50 | 49.50  | Wiersma et al. 2007          |
| Aves | Passeriformes | Passeri | <i>Coccothraustes coccothraustes</i> | 48.30 | 125.50 | Kendeigh et al. 1977         |
| Aves | Passeriformes | Passeri | <i>Coereba flaveola</i>              | 11.00 | 43.64  | Londono et al., 2015         |
| Aves | Passeriformes | Passeri | <i>Coereba flaveola</i>              | 10.00 | 38.50  | Merola-Zwartjes 1998         |

|      |               |         |                                    |         |        |                              |
|------|---------------|---------|------------------------------------|---------|--------|------------------------------|
| Aves | Passeriformes | Passeri | <i>Coloeus monedula</i>            | 188.00  | 309.50 | Daan et al. 1990             |
| Aves | Passeriformes | Passeri | <i>Conirostrum sitticolor</i>      | 11.00   | 32.73  | Londono et al., 2015         |
| Aves | Passeriformes | Passeri | <i>Conopophaga ardesiaca</i>       | 27.50   | 70.91  | Londono et al., 2015         |
| Aves | Passeriformes | Passeri | <i>Conopophaga peruviana</i>       | 24.50   | 61.82  | Londono et al., 2015         |
| Aves | Passeriformes | Passeri | <i>Contopus virens</i>             | 13.90   | 46.50  | Yarbrough 1971               |
| Aves | Passeriformes | Passeri | <i>Copsychus malabaricus</i>       | 27.24   | 57.65  | Bushuev et al. (unpublished) |
| Aves | Passeriformes | Passeri | <i>Copsychus saularis</i>          | 35.61   | 64.85  | Bushuev et al. (unpublished) |
| Aves | Passeriformes | Passeri | <i>Copsychus saularis</i>          | 33.50   | 41.50  | Hails, 1983                  |
| Aves | Passeriformes | Passeri | <i>Corvus brachyrhynchos</i>       | 384.80  | 591.50 | Wunder, Trebella, 1976       |
| Aves | Passeriformes | Passeri | <i>Corvus caurinus</i>             | 282.00  | 638.50 | Irving et al., 1955          |
| Aves | Passeriformes | Passeri | <i>Corvus corax</i>                | 1203.00 | 990.00 | Kendeigh et al. 1977         |
| Aves | Passeriformes | Passeri | <i>Corvus corone</i>               | 518.00  | 596.50 | Kendeigh et al. 1977         |
| Aves | Passeriformes | Passeri | <i>Corvus fuscicapillus</i>        | 390.00  | 471.00 | Kendeigh et al. 1977         |
| Aves | Passeriformes | Passeri | <i>Corvus ruficollis</i>           | 660.00  | 611.50 | Kendeigh et al. 1977         |
| Aves | Passeriformes | Passeri | <i>Corydon sumatranus</i>          | 115.33  | 107.75 | Bushuev et al. (unpublished) |
| Aves | Passeriformes | Passeri | <i>Corythopsis torquatus</i>       | 18.70   | 50.91  | Londono et al., 2015         |
| Aves | Passeriformes | Passeri | <i>Cracticus torquatus</i>         | 93.70   | 127.80 | Bech et al., 2016            |
| Aves | Passeriformes | Passeri | <i>Cranioleuca marcapatae</i>      | 19.00   | 50.91  | Londono et al., 2015         |
| Aves | Passeriformes | Passeri | <i>Crypsirina temia</i>            | 47.74   | 82.80  | Bushuev et al. (unpublished) |
| Aves | Passeriformes | Passeri | <i>Cryptopipo holochlora</i>       | 16.00   | 38.18  | Londono et al., 2015         |
| Aves | Passeriformes | Passeri | <i>Cyanerpes cyaneus</i>           | 13.50   | 49.00  | Wiersma et al. 2007          |
| Aves | Passeriformes | Passeri | <i>Cyanistes caeruleus</i>         | 9.60    | 30.00  | Lindstrom & Kvist 1995       |
| Aves | Passeriformes | Passeri | <i>Cyanocitta cristata</i>         | 80.80   | 150.00 | Misch 1960                   |
| Aves | Passeriformes | Passeri | <i>Cyanocompsa cyanoides</i>       | 25.00   | 69.09  | Londono et al., 2015         |
| Aves | Passeriformes | Passeri | <i>Cyanocompsa cyanoides</i>       | 27.90   | 67.50  | Wiersma et al. 2007          |
| Aves | Passeriformes | Passeri | <i>Cyanolyca viridicyanus</i>      | 82.60   | 194.55 | Londono et al., 2015         |
| Aves | Passeriformes | Passeri | <i>Cyanomitra cyanolaema</i>       | 15.80   | 49.00  | Seavy 2006                   |
| Aves | Passeriformes | Passeri | <i>Cyanomitra obscura</i>          | 11.20   | 36.00  | Seavy 2006                   |
| Aves | Passeriformes | Passeri | <i>Cyanomitra veroxii</i>          | 8.40    | 24.00  | Prinzinger et al. 1989       |
| Aves | Passeriformes | Passeri | <i>Cyanomitra verticalis</i>       | 14.10   | 45.00  | Seavy 2006                   |
| Aves | Passeriformes | Passeri | <i>Cymbirhynchus macrorhynchos</i> | 52.64   | 86.49  | Bushuev et al. (unpublished) |
| Aves | Passeriformes | Passeri | <b><i>Cyornis hainanus</i></b>     | 13.32   | 38.55  | Bushuev et al. (unpublished) |
| Aves | Passeriformes | Passeri | <b><i>Cyornis sumatrensis</i></b>  | 12.49   | 38.87  | Bushuev et al. (unpublished) |
| Aves | Passeriformes | Passeri | <i>Cyphorhinus thoracicus</i>      | 34.40   | 76.36  | Londono et al., 2015         |
| Aves | Passeriformes | Passeri | <i>Delichon urbicum</i>            | 18.00   | 23.00  | Prinzinger & Hanssler 1980   |
| Aves | Passeriformes | Passeri | <i>Dendrocincla fuliginosa</i>     | 33.10   | 67.27  | Londono et al., 2015         |
| Aves | Passeriformes | Passeri | <i>Dendrocincla fuliginosa</i>     | 39.00   | 88.50  | Wiersma et al. 2007          |
| Aves | Passeriformes | Passeri | <i>Dendrocincla merula</i>         | 52.80   | 112.73 | Londono et al., 2015         |
| Aves | Passeriformes | Passeri | <i>Dendrocincla tyrannina</i>      | 58.30   | 96.36  | Londono et al., 2015         |
| Aves | Passeriformes | Passeri | <i>Dendrocolaptes picumnus</i>     | 80.20   | 130.91 | Londono et al., 2015         |
| Aves | Passeriformes | Passeri | <i>Devioeca papuana</i>            | 12.50   | 55.50  | McNab, pers. obs.            |
| Aves | Passeriformes | Passeri | <i>Dicaeum cruentatum</i>          | 5.08    | 15.56  | Bushuev et al. (unpublished) |
| Aves | Passeriformes | Passeri | <i>Dicrurus aeneus</i>             | 29.84   | 73.62  | Bushuev et al. (unpublished) |
| Aves | Passeriformes | Passeri | <i>Dicrurus hottentottus</i>       | 76.20   | 128.14 | Bushuev et al. (unpublished) |
| Aves | Passeriformes | Passeri | <i>Dicrurus leucophaeus</i>        | 41.72   | 80.32  | Bushuev et al. (unpublished) |
| Aves | Passeriformes | Passeri | <i>Dicrurus macrocercus</i>        | 63.50   | 94.63  | Bushuev et al. (unpublished) |
| Aves | Passeriformes | Passeri | <i>Dicrurus paradiseus</i>         | 71.60   | 112.15 | Bushuev et al. (unpublished) |
| Aves | Passeriformes | Passeri | <i>Diglossa brunneiventris</i>     | 10.60   | 43.64  | Londono et al., 2015         |
| Aves | Passeriformes | Passeri | <i>Diglossa cyanea</i>             | 19.10   | 58.18  | Londono et al., 2015         |
| Aves | Passeriformes | Passeri | <i>Diglossa mystacalis</i>         | 15.40   | 50.91  | Londono et al., 2015         |

|      |               |         |                                 |        |        |                              |
|------|---------------|---------|---------------------------------|--------|--------|------------------------------|
| Aves | Passeriformes | Passeri | <i>Diphyllodes magnificus</i>   | 82.30  | 142.00 | McNab 2005                   |
| Aves | Passeriformes | Passeri | <i>Drepanis coccinea</i>        | 16.90  | 62.50  | MacMillen, Carpenter, 1977   |
|      |               |         | <i>Drepanorhynchus</i>          |        |        |                              |
| Aves | Passeriformes | Passeri | <i>reichenowi</i>               | 6.70   | 25.50  | Seavy 2006                   |
| Aves | Passeriformes | Passeri | <i>Drymophila caudata</i>       | 12.20  | 25.45  | Londono et al., 2015         |
| Aves | Passeriformes | Passeri | <i>Elaenia albiceps</i>         | 16.80  | 34.55  | Londono et al., 2015         |
| Aves | Passeriformes | Passeri | <i>Elaenia gigas</i>            | 30.70  | 74.55  | Londono et al., 2015         |
| Aves | Passeriformes | Passeri | <i>Elaenia obscura</i>          | 13.90  | 25.45  | Londono et al., 2015         |
| Aves | Passeriformes | Passeri | <i>Elaenia pallatangae</i>      | 15.70  | 41.82  | Londono et al., 2015         |
| Aves | Passeriformes | Passeri | <i>Emberiza citrinella</i>      | 26.80  | 78.50  | Gavrilov & Dol'nik 1985      |
| Aves | Passeriformes | Passeri | <i>Emberiza hortulana</i>       | 24.30  | 75.00  | Gavrilov & Dol'nik 1985      |
| Aves | Passeriformes | Passeri | <i>Emberiza schoeniclus</i>     | 17.60  | 54.00  | Kendeigh et al. 1977         |
| Aves | Passeriformes | Passeri | <i>Empidonax virescens</i>      | 12.30  | 32.00  | Yarbrough 1971               |
| Aves | Passeriformes | Passeri | <i>Entomodestes leucotis</i>    | 60.70  | 47.27  | Londono et al., 2015         |
| Aves | Passeriformes | Passeri | <i>Eopsaltria australis</i>     | 19.20  | 63.00  | Bech et al., 2016            |
| Aves | Passeriformes | Passeri | <i>Epimachus meyeri</i>         | 202.70 | 331.50 | McNab 2005                   |
|      |               |         | <i>Epinecrophylla</i>           |        |        |                              |
| Aves | Passeriformes | Passeri | <i>leucophthalma</i>            | 9.40   | 34.55  | Londono et al., 2015         |
| Aves | Passeriformes | Passeri | <i>Eremalauda dunni</i>         | 20.60  | 50.00  | Tieleman et al. 2002         |
| Aves | Passeriformes | Passeri | <i>Eremophila alpestris</i>     | 26.00  | 59.50  | Trost 1972                   |
| Aves | Passeriformes | Passeri | <i>Erithacus rubecula</i>       | 17.60  | 50.50  | Kendeigh et al. 1977         |
| Aves | Passeriformes | Passeri | <i>Erythrura gouldiae</i>       | 15.50  | 39.00  | Marschall & Prinzinger 1991  |
| Aves | Passeriformes | Passeri | <i>Erythrura trichroa</i>       | 15.10  | 43.00  | McNab, pers. obs.            |
| Aves | Passeriformes | Passeri | <i>Estrilda melpoda</i>         | 7.50   | 23.50  | Marschall & Prinzinger 1991  |
| Aves | Passeriformes | Passeri | <i>Estrilda troglodytes</i>     | 7.50   | 27.00  | Kendeigh et al. 1977         |
| Aves | Passeriformes | Passeri | <i>Eucometis penicillata</i>    | 30.70  | 71.00  | Wiersma et al. 2007          |
|      |               |         | <i>Eulacestoma</i>              |        |        |                              |
| Aves | Passeriformes | Passeri | <i>nigropectus</i>              | 19.90  | 62.00  | McNab, pers. obs.            |
| Aves | Passeriformes | Passeri | <i>Euodice malabarica</i>       | 10.60  | 36.50  | Willoughby, 1969             |
| Aves | Passeriformes | Passeri | <i>Euphonia laniirostris</i>    | 13.50  | 53.00  | Wiersma et al. 2007          |
| Aves | Passeriformes | Passeri | <i>Euphonia xanthogaster</i>    | 12.90  | 40.00  | Londono et al., 2015         |
| Aves | Passeriformes | Passeri | <i>Eurillas curvirostris</i>    | 23.00  | 53.00  | Seavy & McNab 2007           |
| Aves | Passeriformes | Passeri | <i>Eurillas latirostris</i>     | 26.60  | 65.00  | Seavy & McNab 2007           |
| Aves | Passeriformes | Passeri | <i>Eurillas virens</i>          | 24.20  | 59.50  | Seavy & McNab 2007           |
| Aves | Passeriformes | Passeri | <i>Ficedula albicilla</i>       | 9.53   | 42.36  | Bushuev et al. (unpublished) |
| Aves | Passeriformes | Passeri | <i>Ficedula hypoleuca</i>       | 11.70  | 42.00  | Kendeigh et al. 1977         |
| Aves | Passeriformes | Passeri | <i>Ficedula mugimaki</i>        | 12.20  | 63.98  | Bushuev et al. (unpublished) |
| Aves | Passeriformes | Passeri | <i>Formicarius analis</i>       | 54.90  | 112.73 | Londono et al., 2015         |
| Aves | Passeriformes | Passeri | <i>Formicarius rufipectus</i>   | 70.30  | 132.73 | Londono et al., 2015         |
| Aves | Passeriformes | Passeri | <i>Fringilla coelebs</i>        | 21.00  | 67.00  | Gavrilov & Dol'nik 1985      |
| Aves | Passeriformes | Passeri | <i>Fringilla montifringilla</i> | 21.00  | 69.00  | Kendeigh et al. 1977         |
| Aves | Passeriformes | Passeri | <i>Garrulax leucolophus</i>     | 106.83 | 148.91 | Bushuev et al. (unpublished) |
| Aves | Passeriformes | Passeri | <i>Garrulax monileger</i>       | 83.50  | 131.37 | Bushuev et al. (unpublished) |
| Aves | Passeriformes | Passeri | <i>Garrulus glandarius</i>      | 153.00 | 249.50 | Kendeigh et al. 1977         |
| Aves | Passeriformes | Passeri | <i>Gavicalis virescens</i>      | 20.70  | 63.60  | Bech et al., 2016            |
| Aves | Passeriformes | Passeri | <i>Gavicalis virescens</i>      | 25.00  | 53.50  | Collins et al., 1980         |
| Aves | Passeriformes | Passeri | <i>Gavicalis virescens</i>      | 25.00  | 53.50  | Collins et al. 1980          |
| Aves | Passeriformes | Passeri | <i>Geokichla citrina</i>        | 56.60  | 95.10  | Bushuev et al. (unpublished) |
| Aves | Passeriformes | Passeri | <i>Gliciphila melanops</i>      | 18.80  | 52.50  | Vitali et al. 1999           |
| Aves | Passeriformes | Passeri | <i>Glyphorynchus spirurus</i>   | 15.50  | 45.45  | Londono et al., 2015         |
| Aves | Passeriformes | Passeri | <i>Glyphorynchus spirurus</i>   | 13.50  | 36.00  | Wiersma et al. 2007          |
| Aves | Passeriformes | Passeri | <i>Grallaria guatimalensis</i>  | 87.00  | 112.73 | Londono et al., 2015         |

|      |               |         |                                     |       |        |                              |
|------|---------------|---------|-------------------------------------|-------|--------|------------------------------|
| Aves | Passeriformes | Passeri | <i>Grallaria rufula</i>             | 33.80 | 94.55  | Londono et al., 2015         |
| Aves | Passeriformes | Passeri | <i>Gymnophithys bicolor</i>         | 27.70 | 60.00  | Wiesma et al. 2007           |
| Aves | Passeriformes | Passeri | <i>Habia fuscicauda</i>             | 40.00 | 64.00  | Wiersma et al. 2007          |
| Aves | Passeriformes | Passeri | <i>Habia rubica</i>                 | 36.70 | 105.45 | Londono et al., 2015         |
| Aves | Passeriformes | Passeri | <i>Haemorrhous cassinii</i>         | 27.40 | 61.00  | Weathers 1981                |
| Aves | Passeriformes | Passeri | <i>Haemorrhous mexicanus</i>        | 20.40 | 56.00  | Weathers 1981                |
| Aves | Passeriformes | Passeri | <i>Haplospiza rustica</i>           | 18.00 | 25.45  | Londono et al., 2015         |
| Aves | Passeriformes | Passeri | <i>Hedydipna collaris</i>           | 8.30  | 30.50  | Prinzinger et al. 1989       |
| Aves | Passeriformes | Passeri | <i>Hemipus picatus</i>              | 9.70  | 23.96  | Bushuev et al. (unpublished) |
| Aves | Passeriformes | Passeri | <i>Hemispingus atropileus</i>       | 20.40 | 69.09  | Londono et al., 2015         |
| Aves | Passeriformes | Passeri | <i>Hemispingus melanotis</i>        | 17.30 | 58.18  | Londono et al., 2015         |
| Aves | Passeriformes | Passeri | <i>Hemispingus superciliaris</i>    | 14.60 | 58.18  | Londono et al., 2015         |
| Aves | Passeriformes | Passeri | <i>Hemiphysalis xanthophthalmus</i> | 13.00 | 34.55  | Londono et al., 2015         |
| Aves | Passeriformes | Passeri | <i>Hemitriccus granadensis</i>      | 8.20  | 25.45  | Londono et al., 2015         |
| Aves | Passeriformes | Passeri | <i>Henicorhina leucophrys</i>       | 15.30 | 56.36  | Londono et al., 2015         |
| Aves | Passeriformes | Passeri | <i>Hesperiphona vespertina</i>      | 54.50 | 135.50 | West & Hart 1966             |
| Aves | Passeriformes | Passeri | <i>Himatione sanguinea</i>          | 13.50 | 54.00  | Weathers et al. 1983         |
| Aves | Passeriformes | Passeri | <i>Hippolais icterina</i>           | 12.50 | 84.50  | Kendeigh et al. 1977         |
| Aves | Passeriformes | Passeri | <i>Hirundo rustica</i>              | 13.79 | 45.07  | Bushuev et al. (unpublished) |
| Aves | Passeriformes | Passeri | <i>Hirundo rustica</i>              | 18.40 | 54.00  | Gavrilov & Dol'nik 1985      |
| Aves | Passeriformes | Passeri | <i>Hirundo tahitica</i>             | 14.10 | 32.00  | Bryant et al. 1984           |
| Aves | Passeriformes | Passeri | <i>Hydrornis elliotii</i>           | 86.95 | 98.18  | Bushuev et al. (unpublished) |
| Aves | Passeriformes | Passeri | <i>Hydrornis soror</i>              | 96.27 | 102.59 | Bushuev et al. (unpublished) |
| Aves | Passeriformes | Passeri | <i>Hylocichla mustelina</i>         | 48.30 | 122.00 | Holmes, Sawyer, 1975         |
| Aves | Passeriformes | Passeri | <i>Hylophylax naevioides</i>        | 16.10 | 43.00  | Wiersma et al. 2007          |
| Aves | Passeriformes | Passeri | <i>Hylophylax naevius</i>           | 12.80 | 63.64  | Londono et al., 2015         |
| Aves | Passeriformes | Passeri | <i>Hypocnemis subflava</i>          | 15.60 | 43.64  | Londono et al., 2015         |
| Aves | Passeriformes | Passeri | <i>Hypothymis azurea</i>            | 10.53 | 38.40  | Bushuev et al. (unpublished) |
| Aves | Passeriformes | Passeri | <i>Hypothymis azurea</i>            | 10.80 | 32.00  | Hails, 1983                  |
| Aves | Passeriformes | Passeri | <i>Icterus bullockii</i>            | 34.00 | 90.50  | Rising 1969                  |
| Aves | Passeriformes | Passeri | <i>Icterus galbula</i>              | 34.00 | 90.50  | Rising 1969                  |
| Aves | Passeriformes | Passeri | <i>Ifrita kowaldi</i>               | 28.90 | 56.50  | McNab,2009.                  |
| Aves | Passeriformes | Passeri | <i>Iole propinqua</i>               | 20.42 | 49.38  | Bushuev et al. (unpublished) |
| Aves | Passeriformes | Passeri | <i>Irena puella</i>                 | 58.12 | 92.74  | Bushuev et al. (unpublished) |
| Aves | Passeriformes | Passeri | <i>Iridosornis analis</i>           | 27.10 | 85.45  | Londono et al., 2015         |
| Aves | Passeriformes | Passeri | <i>Iridosornis jelskii</i>          | 20.60 | 69.09  | Londono et al., 2015         |
| Aves | Passeriformes | Passeri | <i>Isleria huxwelli</i>             | 10.80 | 38.18  | Londono et al., 2015         |
| Aves | Passeriformes | Passeri | <i>Junco hyemalis</i>               | 18.00 | 53.00  | Lasiewski, Dawson, 1967      |
| Aves | Passeriformes | Passeri | <i>Knipolegus aterrimus</i>         | 34.00 | 56.36  | Londono et al., 2015         |
| Aves | Passeriformes | Passeri | <i>Kurochkegramma hypogrammicum</i> | 10.79 | 31.32  | Bushuev et al. (unpublished) |
| Aves | Passeriformes | Passeri | <i>Lanio versicolor</i>             | 20.40 | 60.00  | Londono et al., 2015         |
| Aves | Passeriformes | Passeri | <i>Lanius collurio</i>              | 27.00 | 69.00  | Kendeigh et al. 1977         |
| Aves | Passeriformes | Passeri | <i>Lanius cristatus</i>             | 29.10 | 74.12  | Bushuev et al. (unpublished) |
| Aves | Passeriformes | Passeri | <i>Lanius cristatus</i>             | 26.90 | 45.50  | Hails, 1983                  |
| Aves | Passeriformes | Passeri | <i>Lanius excubitor</i>             | 72.40 | 184.00 | Kendeigh et al. 1977         |
| Aves | Passeriformes | Passeri | <i>Larvivora cyane</i>              | 13.35 | 38.24  | Bushuev et al. (unpublished) |
| Aves | Passeriformes | Passeri | <i>Larvivora cyane</i>              | 13.40 | 47.50  | Hails, 1983                  |
| Aves | Passeriformes | Passeri | <i>Lathrotriccus euleri</i>         | 9.30  | 38.18  | Londono et al., 2015         |

|      |               |         |                                     |        |        |                              |
|------|---------------|---------|-------------------------------------|--------|--------|------------------------------|
| Aves | Passeriformes | Passeri | <i>Legatus leucophaeus</i>          | 26.70  | 29.09  | Londono et al., 2015         |
| Aves | Passeriformes | Passeri | <i>Leistes militaris</i>            | 38.20  | 79.50  | Wiersma et al. 2007          |
| Aves | Passeriformes | Passeri | <i>Lepidocolaptes lacrymiger</i>    | 32.60  | 40.00  | Londono et al., 2015         |
| Aves | Passeriformes | Passeri | <i>Lepidothrix coeruleocapilla</i>  | 9.60   | 43.64  | Londono et al., 2015         |
| Aves | Passeriformes | Passeri | <i>Lepidothrix coronata</i>         | 9.20   | 27.00  | Wiersma et al. 2007          |
| Aves | Passeriformes | Passeri | <i>Lepidothrix coronata</i>         | 10.60  | 36.36  | Londono et al., 2015         |
| Aves | Passeriformes | Passeri | <i>Leptocoma minima</i>             | 5.50   | 21.00  | Seavy 2006                   |
| Aves | Passeriformes | Passeri | <i>Leptocoma sperata</i>            | 5.10   | 24.28  | Bushuev et al. (unpublished) |
| Aves | Passeriformes | Passeri | <i>Leptopogon amaurocephalus</i>    | 14.10  | 40.00  | Londono et al., 2015         |
| Aves | Passeriformes | Passeri | <i>Leptopogon superciliosus</i>     | 12.90  | 45.45  | Londono et al., 2015         |
| Aves | Passeriformes | Passeri | <i>Lichmera indistincta</i>         | 10.10  | 38.00  | Vitali et al. 1999           |
| Aves | Passeriformes | Passeri | <i>Linaria cannabina</i>            | 16.90  | 61.00  | Kendeigh et al. 1977         |
| Aves | Passeriformes | Passeri | <i>Lipaugus vociferans</i>          | 86.60  | 138.18 | Londono et al., 2015         |
| Aves | Passeriformes | Passeri | <i>Lochmias nematura</i>            | 30.50  | 61.82  | Londono et al., 2015         |
| Aves | Passeriformes | Passeri | <i>Locustella lanceolata</i>        | 9.45   | 32.72  | Bushuev et al. (unpublished) |
| Aves | Passeriformes | Passeri | <i>Lonchura cucullata</i>           | 10.60  | 19.50  | Lovegrove & Smith 2003       |
| Aves | Passeriformes | Passeri | <i>Lonchura fuscans</i>             | 9.50   | 18.00  | Weathers 1977                |
| Aves | Passeriformes | Passeri | <i>Lonchura maja</i>                | 12.80  | 27.50  | Hails, 1983                  |
| Aves | Passeriformes | Passeri | <i>Lonchura malacca</i>             | 11.80  | 25.50  | Hails, 1983                  |
| Aves | Passeriformes | Passeri | <i>Lonchura oryzivora</i>           | 25.40  | 55.50  | Marschell & Prinzing 1991    |
| Aves | Passeriformes | Passeri | <i>Lonchura punctulata</i>          | 12.23  | 37.60  | Bushuev et al. (unpublished) |
| Aves | Passeriformes | Passeri | <i>Lonchura striata</i>             | 9.74   | 33.20  | Bushuev et al. (unpublished) |
| Aves | Passeriformes | Passeri | <i>Lonchura striata</i>             | 10.30  | 38.50  | Kendeigh et al. 1977         |
| Aves | Passeriformes | Passeri | <i>Lophorina superba</i>            | 74.60  | 130.00 | McNab 2005                   |
| Aves | Passeriformes | Passeri | <i>Lophotriccus pileatus</i>        | 8.20   | 34.55  | Londono et al., 2015         |
| Aves | Passeriformes | Passeri | <i>Loxia curvirostra</i>            | 39.40  | 108.00 | Kendeigh et al. 1977         |
| Aves | Passeriformes | Passeri | <i>Loxia leucoptera</i>             | 29.80  | 83.50  | Dawson & Tordoff 1964        |
| Aves | Passeriformes | Passeri | <i>Loxia pytyopsittacus</i>         | 53.70  | 143.50 | Kendeigh et al. 1977         |
| Aves | Passeriformes | Passeri | <i>Loxioides bailleui</i>           | 34.80  | 80.50  | Weathers & van Riper 1982    |
| Aves | Passeriformes | Passeri | <i>Loxioides bailleui</i>           | 36.00  | 80.50  | Weathers, van Riper, 1982    |
| Aves | Passeriformes | Passeri | <i>Lullula arborea</i>              | 25.50  | 103.00 | Tieleman et al. 2002         |
| Aves | Passeriformes | Passeri | <i>Luscinia svecica</i>             | 20.80  | 64.50  | Kendeigh et al. 1977         |
| Aves | Passeriformes | Passeri | <i>Machaerirhynchus nigripictus</i> | 9.70   | 41.50  | McNab, pers. obs.            |
| Aves | Passeriformes | Passeri | <i>Machaeropterus pyrocephalus</i>  | 10.00  | 43.64  | Londono et al., 2015         |
| Aves | Passeriformes | Passeri | <i>Macronus gularis</i>             | 11.27  | 31.86  | Bushuev et al. (unpublished) |
| Aves | Passeriformes | Passeri | <i>Macronus kelleyi</i>             | 9.47   | 30.48  | Bushuev et al. (unpublished) |
| Aves | Passeriformes | Passeri | <i>Magumma parva</i>                | 7.90   | 25.50  | MacMillen, 1981              |
| Aves | Passeriformes | Passeri | <i>Malacocincla abbotti</i>         | 25.63  | 53.55  | Bushuev et al. (unpublished) |
| Aves | Passeriformes | Passeri | <i>Malacopteron cinereum</i>        | 14.33  | 36.87  | Bushuev et al. (unpublished) |
| Aves | Passeriformes | Passeri | <i>Malacopteron cinereum</i>        | 15.80  | 38.00  | Hails, 1983                  |
| Aves | Passeriformes | Passeri | <i>Malurus cyaneus</i>              | 8.70   | 31.80  | Bech et al., 2016            |
| Aves | Passeriformes | Passeri | <i>Malurus lamberti</i>             | 7.80   | 33.00  | Bech et al., 2016            |
| Aves | Passeriformes | Passeri | <i>Manacus vitellinus</i>           | 15.50  | 42.00  | Bartholomew et al. 1983      |
| Aves | Passeriformes | Passeri | <i>Manorina flavigula</i>           | 41.10  | 109.80 | Bech et al., 2016            |
| Aves | Passeriformes | Passeri | <i>Manucodia chalybatus</i>         | 177.20 | 247.00 | McNab 2005                   |
| Aves | Passeriformes | Passeri | <i>Margarornis squamiger</i>        | 16.70  | 49.09  | Londono et al., 2015         |
| Aves | Passeriformes | Passeri | <i>Mecocerculus leucophrys</i>      | 13.90  | 27.27  | Londono et al., 2015         |



|      |               |         |                                  |       |        |                              |
|------|---------------|---------|----------------------------------|-------|--------|------------------------------|
|      |               |         | <i>Mecocerculus</i>              |       |        |                              |
| Aves | Passeriformes | Passeri | <i>stictopterus</i>              | 10.90 | 40.00  | Londono et al., 2015         |
| Aves | Passeriformes | Passeri | <i>Melanocharis versteri</i>     | 13.60 | 44.00  | McNab,2009.                  |
| Aves | Passeriformes | Passeri | <i>Melanorectes nigrescens</i>   | 70.50 | 113.50 | McNab, 2009.                 |
| Aves | Passeriformes | Passeri | <i>Melidectes rufocrissalis</i>  | 62.80 | 140.00 | McNab, 2009.                 |
| Aves | Passeriformes | Passeri | <i>Meliphaga lewinii</i>         | 36.20 | 96.00  | Bech et al., 2016            |
| Aves | Passeriformes | Passeri | <i>Melipotes fumigatus</i>       | 57.10 | 122.00 | McNab, 2009.                 |
| Aves | Passeriformes | Passeri | <i>Melithreptus lunatus</i>      | 14.30 | 45.00  | Vitali et al. 1999           |
| Aves | Passeriformes | Passeri | <i>Melospiza georgiana</i>       | 14.90 | 38.00  | Yarbrough 1971               |
| Aves | Passeriformes | Passeri | <i>Melospiza melodia</i>         | 19.10 | 45.00  | Yarbrough 1971               |
| Aves | Passeriformes | Passeri | <i>Melozona aberti</i>           | 46.60 | 131.00 | Dawson, 1954                 |
| Aves | Passeriformes | Passeri | <i>Melozona fusca</i>            | 43.70 | 119.50 | Dawson, 1954                 |
|      |               |         | <i>Microcerculus</i>             |       |        |                              |
| Aves | Passeriformes | Passeri | <i>marginatus</i>                | 19.40 | 60.00  | Londono et al., 2015         |
| Aves | Passeriformes | Passeri | <i>Mimus gilvus</i>              | 68.90 | 133.00 | Wiersma et al. 2007          |
| Aves | Passeriformes | Passeri | <i>Mimus polyglottos</i>         | 44.20 | 122.00 | Wiersma et al. 2007          |
| Aves | Passeriformes | Passeri | <i>Mionectes macconnelli</i>     | 11.40 | 29.09  | Londono et al., 2015         |
| Aves | Passeriformes | Passeri | <i>Mionectes oleagineus</i>      | 11.40 | 32.73  | Londono et al., 2015         |
| Aves | Passeriformes | Passeri | <i>Mionectes oleagineus</i>      | 10.30 | 29.50  | Wiersma et al. 2007          |
| Aves | Passeriformes | Passeri | <i>Mionectes olivaceus</i>       | 15.70 | 50.91  | Londono et al., 2015         |
| Aves | Passeriformes | Passeri | <i>Mionectes striaticollis</i>   | 14.70 | 49.09  | Londono et al., 2015         |
| Aves | Passeriformes | Passeri | <i>Molothrus ater</i>            | 42.50 | 90.50  | Hinds, Calder, 1973          |
| Aves | Passeriformes | Passeri | <i>Monticola gularis</i>         | 27.00 | 49.20  | Bushuev et al. (unpublished) |
| Aves | Passeriformes | Passeri | <i>Motacilla alba</i>            | 18.00 | 54.00  | Gavrilov & Dol'nik 1985      |
| Aves | Passeriformes | Passeri | <i>Motacilla flava</i>           | 14.70 | 46.50  | Kendeigh et al. 1977         |
| Aves | Passeriformes | Passeri | <i>Muscicapa dauurica</i>        | 9.23  | 34.96  | Bushuev et al. (unpublished) |
| Aves | Passeriformes | Passeri | <i>Muscicapa striata</i>         | 14.40 | 44.50  | Kendeigh et al. 1977         |
| Aves | Passeriformes | Passeri | <i>Muscisaxicola fluviatilis</i> | 13.60 | 47.27  | Londono et al., 2015         |
| Aves | Passeriformes | Passeri | <i>Myadestes raloides</i>        | 28.80 | 70.91  | Londono et al., 2015         |
| Aves | Passeriformes | Passeri | <i>Myiarchus crinitus</i>        | 33.90 | 69.00  | Yarbrough 1971               |
| Aves | Passeriformes | Passeri | <i>Myiobius villosus</i>         | 14.70 | 54.55  | Londono et al., 2015         |
|      |               |         | <i>Myioborus</i>                 |       |        |                              |
| Aves | Passeriformes | Passeri | <i>melanocephalus</i>            | 11.70 | 38.18  | Londono et al., 2015         |
| Aves | Passeriformes | Passeri | <i>Myioborus miniatus</i>        | 9.80  | 36.36  | Londono et al., 2015         |
|      |               |         | <i>Myiodynastes</i>              |       |        |                              |
| Aves | Passeriformes | Passeri | <i>maculatus</i>                 | 41.00 | 106.00 | Wiersma et al. 2007          |
| Aves | Passeriformes | Passeri | <i>Myiotheretes fuscorufus</i>   | 29.20 | 94.55  | Londono et al., 2015         |
| Aves | Passeriformes | Passeri | <i>Myiothlypis bivittata</i>     | 15.50 | 54.55  | Londono et al., 2015         |
|      |               |         | <i>Myiothlypis</i>               |       |        |                              |
| Aves | Passeriformes | Passeri | <i>chrysogaster</i>              | 14.40 | 50.91  | Londono et al., 2015         |
| Aves | Passeriformes | Passeri | <i>Myiothlypis coronata</i>      | 17.40 | 60.00  | Londono et al., 2015         |
| Aves | Passeriformes | Passeri | <i>Myiothlypis fulvicauda</i>    | 12.80 | 63.64  | Londono et al., 2015         |
| Aves | Passeriformes | Passeri | <i>Myiothlypis luteoviridis</i>  | 14.70 | 43.64  | Londono et al., 2015         |
| Aves | Passeriformes | Passeri | <i>Myiothlypis signata</i>       | 14.30 | 40.00  | Londono et al., 2015         |
| Aves | Passeriformes | Passeri | <i>Myiozetetes similis</i>       | 27.10 | 52.73  | Londono et al., 2015         |
| Aves | Passeriformes | Passeri | <i>Myrmeciza longipes</i>        | 27.40 | 58.50  | Wiesma et al. 2007           |
|      |               |         | <i>Myrmelastes</i>               |       |        |                              |
| Aves | Passeriformes | Passeri | <i>leucostigma</i>               | 17.80 | 32.73  | Londono et al., 2015         |
| Aves | Passeriformes | Passeri | <i>Myrmoborus leucophrys</i>     | 19.80 | 60.00  | Londono et al., 2015         |
| Aves | Passeriformes | Passeri | <i>Myrmoborus lophotes</i>       | 31.60 | 60.00  | Londono et al., 2015         |
|      |               |         | <i>Myrmoborus</i>                |       |        |                              |
| Aves | Passeriformes | Passeri | <i>myotherinus</i>               | 21.20 | 50.91  | Londono et al., 2015         |
| Aves | Passeriformes | Passeri | <i>Myrmotherula axillaris</i>    | 8.90  | 34.55  | Londono et al., 2015         |

|      |               |         |                                     |        |        |                              |
|------|---------------|---------|-------------------------------------|--------|--------|------------------------------|
| Aves | Passeriformes | Passeri | <i>Myrmotherula axillaris</i>       | 9.60   | 39.00  | Wiersma et al. 2007          |
| Aves | Passeriformes | Passeri | <i>Myrmotherula longipennis</i>     | 9.60   | 40.00  | Londono et al., 2015         |
| Aves | Passeriformes | Passeri | <i>Myrmotherula menetriesii</i>     | 9.30   | 50.91  | Londono et al., 2015         |
| Aves | Passeriformes | Passeri | <i>Myrmotherula schisticolor</i>    | 8.30   | 45.45  | Londono et al., 2015         |
| Aves | Passeriformes | Passeri | <i>Nectarinia kilimensis</i>        | 16.20  | 47.00  | Seavy 2006                   |
| Aves | Passeriformes | Passeri | <i>Nectarinia tacazze</i>           | 13.50  | 44.00  | Prinzinger et al. 1989       |
| Aves | Passeriformes | Passeri | <i>Neochmia temporalis</i>          | 9.60   | 31.80  | Bech et al., 2016            |
| Aves | Passeriformes | Passeri | <i>Neosericornis citreogularis</i>  | 16.90  | 65.40  | Bech et al., 2016            |
| Aves | Passeriformes | Passeri | <i>Nucifraga caryocatactes</i>      | 147.00 | 242.50 | Kendeigh et al. 1977         |
| Aves | Passeriformes | Passeri | <i>Ochthoeca rufipectoralis</i>     | 10.90  | 36.36  | Londono et al., 2015         |
| Aves | Passeriformes | Passeri | <i>Oneillornis salvini</i>          | 27.10  | 58.18  | Londono et al., 2015         |
| Aves | Passeriformes | Passeri | <i>Onychorhynchus coronatus</i>     | 14.00  | 54.55  | Londono et al., 2015         |
| Aves | Passeriformes | Passeri | <i>Oreocharis arfaki</i>            | 22.30  | 58.00  | McNab, pers. obs.            |
| Aves | Passeriformes | Passeri | <i>Oreostruthus fuliginosus</i>     | 16.00  | 29.50  | McNab, pers. obs.            |
| Aves | Passeriformes | Passeri | <i>Origma robusta</i>               | 17.30  | 45.50  | McNab, 2009                  |
| Aves | Passeriformes | Passeri | <i>Oriolus oriolus</i>              | 64.90  | 117.00 | Kendeigh et al. 1977         |
| Aves | Passeriformes | Passeri | <i>Oriolus xanthornus</i>           | 59.90  | 112.02 | Bushuev et al. (unpublished) |
| Aves | Passeriformes | Passeri | <i>Orthotomus atrogularis</i>       | 6.73   | 27.35  | Bushuev et al. (unpublished) |
| Aves | Passeriformes | Passeri | <i>Oryzoborus angolensis</i>        | 12.30  | 36.00  | Wiersma et al. 2007          |
| Aves | Passeriformes | Passeri | <i>Pachycephala pectoralis</i>      | 24.00  | 64.80  | Bech et al., 2016            |
| Aves | Passeriformes | Passeri | <i>Pachycephala schlegelii</i>      | 22.60  | 50.00  | McNab, pers. obs.            |
| Aves | Passeriformes | Passeri | <i>Pachycephala soror</i>           | 23.30  | 65.50  | McNab, pers. obs.            |
| Aves | Passeriformes | Passeri | <i>Paradisaea raggiana</i>          | 215.70 | 337.50 | McNab 2005                   |
| Aves | Passeriformes | Passeri | <i>Paradisaea rudolphi</i>          | 156.10 | 274.00 | McNab 2005                   |
| Aves | Passeriformes | Passeri | <i>Paramythia montium</i>           | 40.30  | 75.00  | McNab, pers. obs.            |
| Aves | Passeriformes | Passeri | <i>Pardalotus punctatus</i>         | 7.80   | 39.60  | Bech et al., 2016            |
| Aves | Passeriformes | Passeri | <i>Parkesia noveboracensis</i>      | 18.70  | 50.50  | Yarbrough 1971               |
| Aves | Passeriformes | Passeri | <i>Parotia lawesii</i>              | 144.90 | 206.50 | McNab 2005                   |
| Aves | Passeriformes | Passeri | <i>Parotia wahnesi</i>              | 164.20 | 232.00 | McNab 2005                   |
| Aves | Passeriformes | Passeri | <i>Parus major</i>                  | 16.50  | 63.00  | Reinertsen & Haftorn 1986    |
| Aves | Passeriformes | Passeri | <i>Passer domesticus</i>            | 23.00  | 56.40  | Bech et al., 2016            |
| Aves | Passeriformes | Passeri | <i>Passer domesticus</i>            | 23.00  | 66.00  | Kendeigh et al. 1977         |
| Aves | Passeriformes | Passeri | <i>Passer montanus</i>              | 22.30  | 73.00  | Kendeigh et al. 1977         |
| Aves | Passeriformes | Passeri | <i>Passerculus sandwichensis</i>    | 15.90  | 40.00  | Williams & Hansell 1981      |
| Aves | Passeriformes | Passeri | <i>Passerella iliaca</i>            | 31.70  | 98.50  | Lasiewski, Dawson, 1967      |
| Aves | Passeriformes | Passeri | <i>Pellorneum ruficeps</i>          | 21.85  | 53.32  | Bushuev et al. (unpublished) |
| Aves | Passeriformes | Passeri | <i>Pellorneum tickelli</i>          | 15.80  | 39.29  | Bushuev et al. (unpublished) |
| Aves | Passeriformes | Passeri | <i>Peneothello cyanus</i>           | 23.80  | 63.00  | McNab, pers. obs.            |
| Aves | Passeriformes | Passeri | <i>Peneothello sigillata</i>        | 21.60  | 56.00  | McNab, pers. obs.            |
| Aves | Passeriformes | Passeri | <i>Periparus ater</i>               | 10.80  | 42.50  | Kendeigh et al. 1977         |
| Aves | Passeriformes | Passeri | <i>Perisoreus canadensis</i>        | 71.20  | 122.00 | Veghte, 1964                 |
| Aves | Passeriformes | Passeri | <i>Pheugopedius fasciatoventris</i> | 27.20  | 56.00  | Wiersma et al. 2007          |
| Aves | Passeriformes | Passeri | <i>Philemon buceroides</i>          | 140.50 | 253.00 | Bonaccorso &                 |
| Aves | Passeriformes | Passeri | <i>Philydor erythrocercum</i>       | 38.20  | 76.36  | Londono et al., 2015         |
| Aves | Passeriformes | Passeri | <i>Phlegopsis nigromaculata</i>     | 47.10  | 87.27  | Londono et al., 2015         |

|      |               |         |                                          |        |        |                              |
|------|---------------|---------|------------------------------------------|--------|--------|------------------------------|
| Aves | Passeriformes | Passeri | <i>Phoenicurus ochruros</i>              | 13.80  | 43.50  | Kendeigh et al. 1977         |
| Aves | Passeriformes | Passeri | <i>Phoenicurus</i>                       |        |        |                              |
| Aves | Passeriformes | Passeri | <i>phoenicurus</i>                       | 13.00  | 42.00  | Kendeigh et al. 1977         |
| Aves | Passeriformes | Passeri | <i>Phonygammus</i>                       |        |        |                              |
| Aves | Passeriformes | Passeri | <i>keraudrenii</i>                       | 170.70 | 215.50 | McNab 2005                   |
| Aves | Passeriformes | Passeri | <i>Phyllastrephus</i>                    |        |        |                              |
| Aves | Passeriformes | Passeri | <i>hypochloris</i>                       | 18.90  | 47.50  | Seavy & McNab 2007           |
| Aves | Passeriformes | Passeri | <i>Phylloscopus collybita</i>            | 8.20   | 29.50  | Kendeigh et al. 1977         |
| Aves | Passeriformes | Passeri | <i>Phylloscopus inornatus</i>            | 7.70   | 53.92  | Bushuev et al. (unpublished) |
| Aves | Passeriformes | Passeri | <b><i>Phylloscopus plumbeitarsus</i></b> | 5.95   | 21.08  | Bushuev et al. (unpublished) |
| Aves | Passeriformes | Passeri | <i>Phylloscopus schwarzi</i>             | 7.80   | 28.17  | Bushuev et al. (unpublished) |
| Aves | Passeriformes | Passeri | <i>Phylloscopus sibilatrix</i>           | 9.20   | 31.50  | Kendeigh et al. 1977         |
| Aves | Passeriformes | Passeri | <i>Phylloscopus tenellipes</i>           | 7.00   | 28.94  | Bushuev et al. (unpublished) |
| Aves | Passeriformes | Passeri | <i>Phylloscopus trochilus</i>            | 10.70  | 37.50  | Kendeigh et al. 1977         |
| Aves | Passeriformes | Passeri | <i>Phytotoma rara</i>                    | 41.60  | 103.00 | Rezende et al. 2001          |
| Aves | Passeriformes | Passeri | <i>Pica nuttalli</i>                     | 151.90 | 264.00 | Hayworth & Weathers 1984     |
| Aves | Passeriformes | Passeri | <i>Pica pica</i>                         | 158.90 | 215.50 | Hayworth & Weathers 1984     |
| Aves | Passeriformes | Passeri | <i>Pinicola enucleator</i>               | 78.40  | 195.50 | Gavrilov & Dol'nik 1985      |
| Aves | Passeriformes | Passeri | <i>Pipra fasciicauda</i>                 | 16.40  | 47.27  | Londono et al., 2015         |
| Aves | Passeriformes | Passeri | <i>Pipraeidea melanonota</i>             | 20.30  | 69.09  | Londono et al., 2015         |
| Aves | Passeriformes | Passeri | <i>Pipreola arcuata</i>                  | 93.00  | 109.09 | Londono et al., 2015         |
| Aves | Passeriformes | Passeri | <i>Pipreola intermedia</i>               | 49.60  | 110.91 | Londono et al., 2015         |
| Aves | Passeriformes | Passeri | <i>Pitta moluccensis</i>                 | 74.38  | 96.62  | Bushuev et al. (unpublished) |
| Aves | Passeriformes | Passeri | <i>Pitta versicolor</i>                  | 83.10  | 102.00 | McNab 2009                   |
| Aves | Passeriformes | Passeri | <i>Platyrinchus coronatus</i>            | 10.80  | 29.09  | Londono et al., 2015         |
| Aves | Passeriformes | Passeri | <i>Platyrinchus</i>                      |        |        |                              |
| Aves | Passeriformes | Passeri | <i>platyrhynchos</i>                     | 14.00  | 54.55  | Londono et al., 2015         |
| Aves | Passeriformes | Passeri | <i>Plectrophenax nivalis</i>             | 41.80  | 99.50  | Scholander et al., 1950      |
| Aves | Passeriformes | Passeri | <i>Plesiodryas albonotata</i>            | 36.40  | 81.00  | McNab, 2009.                 |
| Aves | Passeriformes | Passeri | <i>Ploceus philippinus</i>               | 22.06  | 59.89  | Bushuev et al. (unpublished) |
| Aves | Passeriformes | Passeri | <i>Poecile atricapillus</i>              | 10.30  | 45.50  | Rising & Hudson 1974         |
| Aves | Passeriformes | Passeri | <i>Poecile montanus</i>                  | 11.60  | 49.50  | Reinertsen & Haftorn 1986    |
| Aves | Passeriformes | Passeri | <i>Pogonotriccus</i>                     |        |        |                              |
| Aves | Passeriformes | Passeri | <i>ophthalmicus</i>                      | 8.80   | 43.64  | Londono et al., 2015         |
| Aves | Passeriformes | Passeri | <i>Poliocrania exsul</i>                 | 28.30  | 52.00  | Wiesma et al. 2007           |
| Aves | Passeriformes | Passeri | <i>Pomatorhinus</i>                      |        |        |                              |
| Aves | Passeriformes | Passeri | <i>hypoleucos</i>                        | 83.80  | 148.65 | Bushuev et al. (unpublished) |
| Aves | Passeriformes | Passeri | <i>Pomatorhinus</i>                      |        |        |                              |
| Aves | Passeriformes | Passeri | <i>schisticeps</i>                       | 36.00  | 75.16  | Bushuev et al. (unpublished) |
| Aves | Passeriformes | Passeri | <i>Pomatostomus ruficeps</i>             | 45.40  | 79.20  | Bech et al., 2016            |
| Aves | Passeriformes | Passeri | <i>Pomatostomus</i>                      |        |        |                              |
| Aves | Passeriformes | Passeri | <i>superciliosus</i>                     | 36.10  | 61.80  | Bech et al., 2016            |
| Aves | Passeriformes | Passeri | <i>Poecetes gramineus</i>                | 21.50  | 49.00  | Yarbrough 1971               |
| Aves | Passeriformes | Passeri | <i>Premnoplex</i>                        |        |        |                              |
| Aves | Passeriformes | Passeri | <i>brunnescens</i>                       | 15.70  | 58.18  | Londono et al., 2015         |
| Aves | Passeriformes | Passeri | <i>Prinia flaviventris</i>               | 7.16   | 26.78  | Bushuev et al. (unpublished) |
| Aves | Passeriformes | Passeri | <i>Prinia hodgsonii</i>                  | 7.21   | 33.58  | Bushuev et al. (unpublished) |
| Aves | Passeriformes | Passeri | <i>Prinia inornata</i>                   | 10.25  | 41.04  | Bushuev et al. (unpublished) |
| Aves | Passeriformes | Passeri | <i>Progne chalybea</i>                   | 34.90  | 84.00  | Wiersma et al. 2007          |
| Aves | Passeriformes | Passeri | <i>Prothemadera</i>                      |        |        |                              |
| Aves | Passeriformes | Passeri | <i>novaeseelandiae</i>                   | 144.20 | 199.00 | McNab 2009.                  |
| Aves | Passeriformes | Passeri | <i>Protonotaria citrea</i>               | 12.80  | 36.00  | Yarbrough 1971               |
| Aves | Passeriformes | Passeri | <i>Prunella modularis</i>                | 16.80  | 58.50  | Kendeigh et al. 1977         |
| Aves | Passeriformes | Passeri | <i>Psaltriparus minimus</i>              | 5.50   | 23.00  | Chaplin 1982                 |

|      |               |         |                                                |        |        |                              |
|------|---------------|---------|------------------------------------------------|--------|--------|------------------------------|
| Aves | Passeriformes | Passeri | <i>Pseudocolaptes</i><br><i>boissonneautii</i> | 42.90  | 100.00 | Londono et al., 2015         |
| Aves | Passeriformes | Passeri | <i>Psophodes olivaceus</i>                     | 61.00  | 127.20 | Bech et al., 2016            |
| Aves | Passeriformes | Passeri | <i>Ptiloprora guisei</i>                       | 20.70  | 52.50  | McNab, 2009.                 |
| Aves | Passeriformes | Passeri | <i>Ptiloris magnificus</i>                     | 179.40 | 270.00 | McNab 2005                   |
| Aves | Passeriformes | Passeri | <i>Pycnonotus atriceps</i>                     | 21.54  | 52.37  | Bushuev et al. (unpublished) |
| Aves | Passeriformes | Passeri | <i>Pycnonotus aurigaster</i>                   | 27.00  | 57.02  | Bushuev et al. (unpublished) |
| Aves | Passeriformes | Passeri | <i>Pycnonotus barbatus</i>                     | 40.30  | 86.00  | Seavy & McNab 2007           |
| Aves | Passeriformes | Passeri | <i>Pycnonotus blanfordi</i>                    | 28.83  | 55.29  | Bushuev et al. (unpublished) |
| Aves | Passeriformes | Passeri | <i>Pycnonotus finlaysoni</i>                   | 25.91  | 54.70  | Bushuev et al. (unpublished) |
| Aves | Passeriformes | Passeri | <i>Pycnonotus finlaysoni</i>                   | 26.30  | 40.50  | Hails, 1983                  |
| Aves | Passeriformes | Passeri | <i>Pycnonotus goiavier</i>                     | 28.60  | 44.00  | Hails, 1983                  |
| Aves | Passeriformes | Passeri | <i>Pycnonotus jocosus</i>                      | 32.90  | 64.20  | Bech et al., 2016            |
| Aves | Passeriformes | Passeri | <i>Pycnonotus</i><br><i>melanicterus</i>       | 22.93  | 52.85  | Bushuev et al. (unpublished) |
| Aves | Passeriformes | Passeri | <i>Pyriglena leuconota</i>                     | 32.10  | 100.00 | Londono et al., 2015         |
| Aves | Passeriformes | Passeri | <i>Pyrhcorax graculus</i>                      | 206.40 | 308.50 | Kendeigh et al. 1977         |
| Aves | Passeriformes | Passeri | <i>Pyrrhomyias</i><br><i>cinnamomeus</i>       | 10.70  | 36.36  | Londono et al., 2015         |
| Aves | Passeriformes | Passeri | <i>Pyrrhula pyrrhula</i>                       | 30.40  | 99.50  | Kendeigh et al. 1977         |
| Aves | Passeriformes | Passeri | <i>Quiscalus mexicanus</i>                     | 137.30 | 203.00 | Wiersma et al. 2007          |
| Aves | Passeriformes | Passeri | <i>Quiscalus quiscula</i>                      | 92.20  | 178.00 | Wiersma et al. 2007          |
| Aves | Passeriformes | Passeri | <i>Ramphocelus carbo</i>                       | 26.50  | 52.73  | Londono et al., 2015         |
| Aves | Passeriformes | Passeri | <i>Ramphocelus dimidiatus</i>                  | 26.40  | 66.00  | Wiersma et al. 2007          |
| Aves | Passeriformes | Passeri | <i>Ramphocelus</i><br><i>flammigerus</i>       | 32.00  | 75.00  | Wiersma et al. 2007          |
| Aves | Passeriformes | Passeri | <i>Ramphotrigon ruficauda</i>                  | 17.40  | 50.91  | Londono et al., 2015         |
| Aves | Passeriformes | Passeri | <i>Regulus regulus</i>                         | 5.50   | 33.00  | Kendeigh et al. 1977         |
| Aves | Passeriformes | Passeri | <i>Rhegmatorhina</i><br><i>melanosticta</i>    | 42.20  | 74.55  | Londono et al., 2015         |
| Aves | Passeriformes | Passeri | <i>Rhipidura albolimbata</i>                   | 9.70   | 29.50  | McNab,2009.                  |
| Aves | Passeriformes | Passeri | <i>Rhipidura atra</i>                          | 11.00  | 55.50  | McNab, 2009.                 |
| Aves | Passeriformes | Passeri | <i>Rhipidura fuliginosa</i>                    | 8.90   | 29.40  | Bech et al., 2016            |
| Aves | Passeriformes | Passeri | <i>Rhynchocyclus</i><br><i>fulvipectus</i>     | 26.00  | 70.91  | Londono et al., 2015         |
| Aves | Passeriformes | Passeri | <i>Rhynchocyclus</i><br><i>olivaceus</i>       | 21.00  | 54.00  | Wiersma et al. 2007          |
| Aves | Passeriformes | Passeri | <i>Riparia riparia</i>                         | 13.60  | 42.00  | Kendeigh et al. 1977         |
| Aves | Passeriformes | Passeri | <i>Rupicola peruvianus</i>                     | 246.50 | 196.36 | Londono et al., 2015         |
| Aves | Passeriformes | Passeri | <i>Saltator coerulescens</i>                   | 47.00  | 70.00  | Bosque et al. 1999           |
| Aves | Passeriformes | Passeri | <i>Saltator grossus</i>                        | 49.50  | 80.00  | Londono et al., 2015         |
| Aves | Passeriformes | Passeri | <i>Saltator maximus</i>                        | 44.80  | 98.50  | Wiersma et al. 2007          |
| Aves | Passeriformes | Passeri | <i>Saltator orenocensis</i>                    | 32.70  | 56.50  | Bosque et al. 1999           |
| Aves | Passeriformes | Passeri | <i>Saltator striatipectus</i>                  | 42.10  | 91.50  | Wiersma et al. 2007          |
| Aves | Passeriformes | Passeri | <i>Saxicola caprata</i>                        | 13.45  | 36.80  | Bushuev et al. (unpublished) |
| Aves | Passeriformes | Passeri | <i>Saxicola rubetra</i>                        | 14.30  | 43.50  | Kendeigh et al. 1977         |
| Aves | Passeriformes | Passeri | <b><i>Saxicola stejnegeri</i></b>              | 11.56  | 48.59  | Bushuev et al. (unpublished) |
| Aves | Passeriformes | Passeri | <i>Saxicola torquatus</i>                      | 16.50  | 46.00  | Klaassen 1995                |
| Aves | Passeriformes | Passeri | <i>Sayornis phoebe</i>                         | 21.60  | 62.00  | Yarbrough 1971               |
| Aves | Passeriformes | Passeri | <i>Sciaphylax hemimelaena</i>                  | 18.00  | 45.45  | Londono et al., 2015         |
| Aves | Passeriformes | Passeri | <i>Sclerurus caudacutus</i>                    | 36.20  | 83.64  | Londono et al., 2015         |
| Aves | Passeriformes | Passeri | <i>Sclerurus mexicanus</i>                     | 28.80  | 80.00  | Londono et al., 2015         |
| Aves | Passeriformes | Passeri | <i>Scytalopus atratus</i>                      | 21.50  | 69.09  | Londono et al., 2015         |

|      |               |         |                                   |        |        |                           |
|------|---------------|---------|-----------------------------------|--------|--------|---------------------------|
| Aves | Passeriformes | Passeri | <i>Scytalopus parvirostris</i>    | 17.00  | 65.45  | Londono et al., 2015      |
| Aves | Passeriformes | Passeri | <i>Seiurus aurocapilla</i>        | 19.00  | 43.50  | Yarbrough 1971            |
| Aves | Passeriformes | Passeri | <i>Sericornis frontalis</i>       | 11.00  | 33.00  | Ambrose &                 |
| Aves | Passeriformes | Passeri | <i>Sericornis frontalis</i>       | 13.20  | 57.60  | Bech et al., 2016         |
| Aves | Passeriformes | Passeri | <i>Sericornis humilis</i>         | 14.60  | 37.00  | Bradshaw 1988 McNab, 2009 |
| Aves | Passeriformes | Passeri | <i>Sericornis magnirostra</i>     | 8.70   | 36.60  | Bech et al., 2016         |
| Aves | Passeriformes | Passeri | <i>Sericornis nouhuysi</i>        | 16.60  | 50.50  | McNab, 2009.              |
| Aves | Passeriformes | Passeri | <i>Serinus canaria</i>            | 13.30  | 41.00  | Gavrilov, Dolnik 1985     |
| Aves | Passeriformes | Passeri | <i>Setophaga americana</i>        | 7.00   | 22.00  | Yarbrongh, 1971           |
| Aves | Passeriformes | Passeri | <i>Setophaga citrina</i>          | 12.00  | 38.50  | Yarbrough, 1971           |
| Aves | Passeriformes | Passeri | <i>Setophaga coronata</i>         | 11.50  | 34.00  | Yarbrough 1971            |
| Aves | Passeriformes | Passeri | <i>Setophaga dominica</i>         | 9.80   | 29.00  | Yarbrough 1971            |
| Aves | Passeriformes | Passeri | <i>Setophaga palmarum</i>         | 9.80   | 28.00  | Yarbrough 1971            |
| Aves | Passeriformes | Passeri | <i>Setophaga petechia</i>         | 12.20  | 25.00  | Wiersma et al. 2007       |
| Aves | Passeriformes | Passeri | <i>Setophaga pinus</i>            | 12.00  | 32.00  | Yarbrough 1971            |
| Aves | Passeriformes | Passeri | <i>Sialia mexicana</i>            | 27.50  | 76.00  | Mock 1991                 |
| Aves | Passeriformes | Passeri | <i>Silvicultrix pulchella</i>     | 12.00  | 30.91  | Londono et al., 2015      |
| Aves | Passeriformes | Passeri | <i>Silvicultrix spodionota</i>    | 10.70  | 30.91  | Londono et al., 2015      |
| Aves | Passeriformes | Passeri | <i>Sitta canadensis</i>           | 11.20  | 42.00  | Mugas, Templeton, 1970    |
| Aves | Passeriformes | Passeri | <i>Sitta carolinensis</i>         | 18.30  | 52.00  | Liknes & Swanson 1996     |
| Aves | Passeriformes | Passeri | <i>Sittasomus griseicapillus</i>  | 14.40  | 49.09  | Londono et al., 2015      |
| Aves | Passeriformes | Passeri | <i>Smicrornis brevirostris</i>    | 5.90   | 29.40  | Bech et al., 2016         |
| Aves | Passeriformes | Passeri | <i>Spinus magellanicus</i>        | 11.60  | 36.36  | Londono et al., 2015      |
| Aves | Passeriformes | Passeri | <i>Spinus spinus</i>              | 14.00  | 52.50  | Kendeigh et al. 1977      |
| Aves | Passeriformes | Passeri | <i>Spinus tristis</i>             | 12.80  | 54.50  | Dawson & Carey 1976       |
| Aves | Passeriformes | Passeri | <i>Spizella passerina</i>         | 11.90  | 35.00  | Yarbrough 1971            |
| Aves | Passeriformes | Passeri | <i>Spizelloides arborea</i>       | 16.60  | 59.50  | Losiewski, Dawson, 1967   |
| Aves | Passeriformes | Passeri | <i>Sporophila americana</i>       | 10.20  | 35.50  | Wiersma et al. 2007       |
| Aves | Passeriformes | Passeri | <i>Sporophila castaneiventris</i> | 8.50   | 36.36  | Londono et al., 2015      |
| Aves | Passeriformes | Passeri | <i>Sporophila nigricollis</i>     | 8.90   | 36.36  | Londono et al., 2015      |
| Aves | Passeriformes | Passeri | <i>Stelgidopteryx ruficollis</i>  | 14.00  | 40.00  | Londono et al., 2015      |
| Aves | Passeriformes | Passeri | <i>Stelgidopteryx ruficollis</i>  | 11.90  | 28.50  | Wiersma et al. 2007       |
| Aves | Passeriformes | Passeri | <i>Strepera graculina</i>         | 306.70 | 339.00 | Bech et al., 2016         |
| Aves | Passeriformes | Passeri | <i>Sturnus vulgaris</i>           | 57.50  | 105.60 | Bech et al., 2016         |
| Aves | Passeriformes | Passeri | <i>Sturnus vulgaris</i>           | 75.00  | 158.00 | Kendeigh et al. 1977      |
| Aves | Passeriformes | Passeri | <i>Sylvia atricapilla</i>         | 21.90  | 75.00  | Kendeigh et al. 1977      |
| Aves | Passeriformes | Passeri | <i>Sylvia borin</i>               | 24.80  | 75.00  | Kendeigh et al. 1977      |
| Aves | Passeriformes | Passeri | <i>Sylvia curruca</i>             | 10.60  | 36.00  | Kendeigh et al. 1977      |
| Aves | Passeriformes | Passeri | <i>Sylvia nisoria</i>             | 21.30  | 69.00  | Kendeigh et al. 1977      |
| Aves | Passeriformes | Passeri | <i>Symphysichrus axillaris</i>    | 17.50  | 90.50  | McNab, pers. obs.         |
| Aves | Passeriformes | Passeri | <i>Synallaxis azarae</i>          | 13.60  | 41.82  | Londono et al., 2015      |
| Aves | Passeriformes | Passeri | <i>Synallaxis cabanisi</i>        | 19.30  | 54.55  | Londono et al., 2015      |
| Aves | Passeriformes | Passeri | <i>Syndactyla ucayalae</i>        | 51.20  | 110.91 | Londono et al., 2015      |
| Aves | Passeriformes | Passeri | <i>Tachycineta albilinea</i>      | 11.70  | 45.00  | Wiersma et al. 2007       |
| Aves | Passeriformes | Passeri | <i>Tachycineta bicolor</i>        | 16.40  | 51.50  | Wiersma et al. 2007       |
| Aves | Passeriformes | Passeri | <i>Tachyphonus luctuosus</i>      | 12.50  | 58.18  | Londono et al., 2015      |
| Aves | Passeriformes | Passeri | <i>Taeniopygia guttata</i>        | 11.70  | 38.40  | Bech et al., 2016         |
| Aves | Passeriformes | Passeri | <i>Taeniopygia guttata</i>        | 11.70  | 37.00  | Calder 1964               |
| Aves | Passeriformes | Passeri | <i>Tangara arthus</i>             | 22.40  | 67.27  | Londono et al., 2015      |
| Aves | Passeriformes | Passeri | <i>Tangara cyanicollis</i>        | 16.30  | 63.64  | Londono et al., 2015      |

|      |               |         |                                    |        |        |                              |
|------|---------------|---------|------------------------------------|--------|--------|------------------------------|
| Aves | Passeriformes | Passeri | <i>Tangara larvata</i>             | 16.20  | 42.50  | Wiersma et al. 2007          |
| Aves | Passeriformes | Passeri | <i>Tangara vassorii</i>            | 18.50  | 41.82  | Londono et al., 2015         |
| Aves | Passeriformes | Passeri | <i>Tangara xanthogastra</i>        | 15.10  | 38.18  | Londono et al., 2015         |
| Aves | Passeriformes | Passeri | <i>Tarsiger cyanurus</i>           | 14.80  | 42.50  | Gavrilov & Dol'nik 1985      |
| Aves | Passeriformes | Passeri | <i>Telespiza cantans</i>           | 31.60  | 76.50  | Weathers & van Riper 1982    |
| Aves | Passeriformes | Passeri | <i>Telespiza cantans</i>           | 32.80  | 79.50  | Weathers, van Riper, 1982    |
| Aves | Passeriformes | Passeri | <i>Tephrodornis virgatus</i>       | 35.13  | 88.38  | Bushuev et al. (unpublished) |
| Aves | Passeriformes | Passeri | <i>Terenotriccus erythrurus</i>    | 9.30   | 43.64  | Londono et al., 2015         |
| Aves | Passeriformes | Passeri | <i>Terpsiphone affinis</i>         | 17.00  | 43.35  | Bushuev et al. (unpublished) |
| Aves | Passeriformes | Passeri | <i>Thamnomanes ardesiacus</i>      | 19.30  | 49.09  | Londono et al., 2015         |
| Aves | Passeriformes | Passeri | <i>Thamnomanes schistogynus</i>    | 19.70  | 61.82  | Londono et al., 2015         |
| Aves | Passeriformes | Passeri | <i>Thamnophilus atrinucha</i>      | 20.50  | 50.50  | Wiersma et al. 2007          |
| Aves | Passeriformes | Passeri | <i>Thamnophilus doliatus</i>       | 26.20  | 51.50  | Wiersma et al. 2007          |
| Aves | Passeriformes | Passeri | <i>Thamnophilus palliatus</i>      | 27.80  | 89.09  | Londono et al., 2015         |
| Aves | Passeriformes | Passeri | <i>Thamnophilus punctatus</i>      | 21.00  | 62.00  | Vleck & Vleck 1979           |
| Aves | Passeriformes | Passeri | <i>Thlypopsis ruficeps</i>         | 11.90  | 41.82  | Londono et al., 2015         |
| Aves | Passeriformes | Passeri | <i>Thlypopsis sordida</i>          | 14.90  | 56.36  | Londono et al., 2015         |
| Aves | Passeriformes | Passeri | <i>Thraupis bonariensis</i>        | 34.80  | 101.82 | Londono et al., 2015         |
| Aves | Passeriformes | Passeri | <i>Thraupis cyanocephala</i>       | 38.20  | 83.64  | Londono et al., 2015         |
| Aves | Passeriformes | Passeri | <i>Thraupis episcopus</i>          | 30.40  | 72.00  | Wiersma et al. 2007          |
| Aves | Passeriformes | Passeri | <i>Thraupis palmarum</i>           | 32.60  | 71.00  | Wiersma et al. 2007          |
| Aves | Passeriformes | Passeri | <i>Thripadectes holostictus</i>    | 42.50  | 69.09  | Londono et al., 2015         |
| Aves | Passeriformes | Passeri | <i>Thripadectes melanorhynchus</i> | 47.50  | 98.18  | Londono et al., 2015         |
| Aves | Passeriformes | Passeri | <i>Thryophilus rufalbus</i>        | 22.60  | 53.50  | Wiersma et al. 2007          |
| Aves | Passeriformes | Passeri | <i>Thryothorus ludovicianus</i>    | 14.90  | 64.50  | Eberhardt 1994               |
| Aves | Passeriformes | Passeri | <i>Tiaris canorus</i>              | 7.60   | 28.00  | Gavrilov, 1997               |
| Aves | Passeriformes | Passeri | <i>Tiaris obscurus</i>             | 12.10  | 29.09  | Londono et al., 2015         |
| Aves | Passeriformes | Passeri | <i>Timalia pileata</i>             | 20.62  | 43.50  | Bushuev et al. (unpublished) |
| Aves | Passeriformes | Passeri | <i>Todirostrum cinereum</i>        | 7.30   | 30.50  | Wiersma et al. 2007          |
| Aves | Passeriformes | Passeri | <i>Toxorhamphus poliopterus</i>    | 13.20  | 34.50  | McNab, pers. obs.            |
| Aves | Passeriformes | Passeri | <i>Trichothraupis melanops</i>     | 24.90  | 81.82  | Londono et al., 2015         |
| Aves | Passeriformes | Passeri | <i>Troglodytes aedon</i>           | 10.20  | 37.50  | Wiersma et al. 2007          |
| Aves | Passeriformes | Passeri | <i>Troglodytes aedon</i>           | 13.30  | 38.00  | Wiersma et al. 2007          |
| Aves | Passeriformes | Passeri | <i>Troglodytes solstitialis</i>    | 13.00  | 49.09  | Londono et al., 2015         |
| Aves | Passeriformes | Passeri | <i>Troglodytes troglodytes</i>     | 8.90   | 30.00  | Lindstrom & Kvist 1995       |
| Aves | Passeriformes | Passeri | <i>Turdus albicollis</i>           | 51.30  | 83.64  | Londono et al., 2015         |
| Aves | Passeriformes | Passeri | <i>Turdus chiguanco</i>            | 87.00  | 98.18  | Londono et al., 2015         |
| Aves | Passeriformes | Passeri | <i>Turdus fuscater</i>             | 138.00 | 174.55 | Londono et al., 2015         |
| Aves | Passeriformes | Passeri | <i>Turdus grayi</i>                | 77.90  | 122.00 | Wiersma et al. 2007          |
| Aves | Passeriformes | Passeri | <i>Turdus hauxwelli</i>            | 63.30  | 90.91  | Londono et al., 2015         |
| Aves | Passeriformes | Passeri | <i>Turdus ignobilis</i>            | 56.60  | 74.55  | Londono et al., 2015         |
| Aves | Passeriformes | Passeri | <i>Turdus iliacus</i>              | 58.00  | 130.00 | Kendeigh et al. 1977         |
| Aves | Passeriformes | Passeri | <i>Turdus lawrencii</i>            | 55.30  | 121.82 | Londono et al., 2015         |
| Aves | Passeriformes | Passeri | <i>Turdus leucops</i>              | 62.20  | 129.09 | Londono et al., 2015         |
| Aves | Passeriformes | Passeri | <i>Turdus merula</i>               | 85.10  | 172.80 | Bech et al., 2016            |
| Aves | Passeriformes | Passeri | <i>Turdus merula</i>               | 82.60  | 167.00 | Kendeigh et al. 1977         |

|      |               |         |                                   |        |        |                              |
|------|---------------|---------|-----------------------------------|--------|--------|------------------------------|
| Aves | Passeriformes | Passeri | <i>Turdus migratorius</i>         | 62.40  | 137.00 | Wiermsa et al. 2007          |
| Aves | Passeriformes | Passeri | <i>Turdus nigriceps</i>           | 51.10  | 96.36  | Londono et al., 2015         |
| Aves | Passeriformes | Passeri | <i>Turdus philomelos</i>          | 62.80  | 130.50 | Gavrilov & Dol'nik 1985      |
| Aves | Passeriformes | Passeri | <i>Turdus poliocephalus</i>       | 66.10  | 128.00 | McNab, pers. ob.             |
| Aves | Passeriformes | Passeri | <i>Turdus serranus</i>            | 81.20  | 176.36 | Londono et al., 2015         |
| Aves | Passeriformes | Passeri | <i>Turdus viscivorus</i>          | 108.20 | 198.50 | Kendeigh et al. 1977         |
| Aves | Passeriformes | Passeri | <i>Tyrannus melancholicus</i>     | 38.00  | 65.50  | Wiersma et al. 2007          |
| Aves | Passeriformes | Passeri | <i>Tyrannus tyrannus</i>          | 35.70  | 78.50  | Yarbrough 1971               |
| Aves | Passeriformes | Passeri | <i>Uraeginthus bengalus</i>       | 9.20   | 29.50  | Kendeigh et al. 1977         |
| Aves | Passeriformes | Passeri | <i>Vermivora cyanoptera</i>       | 7.80   | 27.00  | Yarbrough 1971               |
| Aves | Passeriformes | Passeri | <i>Vidua paradisaea</i>           | 10.50  | 35.00  | Terroine, Trautman, 1927     |
| Aves | Passeriformes | Passeri | <i>Vireo flavoviridis</i>         | 15.90  | 50.50  | Wiersma et al. 2007          |
| Aves | Passeriformes | Passeri | <i>Vireo olivaceus</i>            | 16.20  | 43.00  | Wiersma et al. 2007          |
| Aves | Passeriformes | Passeri | <i>Willisornis poecilinotus</i>   | 22.30  | 70.91  | Londono et al., 2015         |
| Aves | Passeriformes | Passeri | <i>Xenops minutus</i>             | 12.70  | 32.73  | Londono et al., 2015         |
| Aves | Passeriformes | Passeri | <i>Xenops minutus</i>             | 9.90   | 41.00  | Wiersma et al. 2007          |
| Aves | Passeriformes | Passeri | <i>Xiphorhynchus elegans</i>      | 41.40  | 92.73  | Londono et al., 2015         |
| Aves | Passeriformes | Passeri | <i>Xiphorhynchus guttatus</i>     | 60.10  | 94.55  | Londono et al., 2015         |
| Aves | Passeriformes | Passeri | <i>Xiphorhynchus guttatus</i>     | 45.20  | 80.50  | Vleck & Vleck 1979           |
| Aves | Passeriformes | Passeri | <i>Xiphorhynchus triangularis</i> | 44.10  | 109.09 | Londono et al., 2015         |
| Aves | Passeriformes | Passeri | <i>Zimmerius bolivianus</i>       | 11.00  | 50.91  | Londono et al., 2015         |
| Aves | Passeriformes | Passeri | <i>Zonotrichia albicollis</i>     | 20.20  | 50.00  | Yarbrough 1971               |
| Aves | Passeriformes | Passeri | <i>Zonotrichia capensis</i>       | 22.20  | 56.36  | Londono et al., 2015         |
| Aves | Passeriformes | Passeri | <i>Zonotrichia leucophrys</i>     | 26.10  | 60.50  | Yarbrough 1971               |
| Aves | Passeriformes | Passeri | <i>Zonotrichia querula</i>        | 33.30  | 88.50  | Yarbrough 1971               |
| Aves | Passeriformes | Passeri | <i>Zoothera dauma</i>             | 107.00 | 143.11 | Bushuev et al. (unpublished) |
| Aves | Passeriformes | Passeri | <i>Zoothera lunulata</i>          | 113.20 | 184.20 | Bech et al., 2016            |
| Aves | Passeriformes | Passeri | <i>Zosterops lateralis</i>        | 10.40  | 37.80  | Bech et al., 2016            |

### References to Table S2 Avian BMR

- Adams N.J., Brown C.R. 1984. Metabolic rates of sub-antarctic Procellariiformes: a comparative study. *Comparative Biochemistry and Physiology Part A: Physiology* 77: 169-173.
- Ambrose S.J., Bradshaw S.D. 1988. Seasonal changes in standard metabolic rates in the white-browed scrubwren *Sericornis frontalis* (Acanthizidae) from arid, semi-arid and mesic environments. *Comparative Biochemistry and Physiology Part A: Physiology* 89: 79-83.
- Bartholomew G.A., Hudson J.W., Howell T.R. 1962. Body temperature, oxygen consumption, evaporative water loss and heart rate in the Poor-will. *The Condor* 64: 117-125.
- Bartholomew G.A., Vleck C.M., Bucher T.L. 1983. Energy metabolism and nocturnal hypothermia in two tropical passerine frugivores, *Manacus vitellinus* and *Pipra mentalis*. *Physiological Zoology* 56: 370-379.
- Baudinette R., Gill P., O'driscoll M. 1986. Energetics of the Little Penguin, *Eudyptula minor*: temperature regulation, the calorogenic effect of food, and moulting. *Australian Journal of Zoology* 34: 35-45.
- Bech C. 1980. Body temperature, metabolic rate, and insulation in winter and summer acclimatized mute swans (*Cygnus olor*). *Journal of Comparative Physiology* 136: 61-66.
- Bech C., Chappell M.A., Astheimer L.B., Londoño G.A., Buttemer W.A. 2016. A 'slow pace of life' in Australian old-endemic passerine birds is not accompanied by low basal metabolic rates. *Journal of Comparative Physiology. B: Biochemical, Systemic, and Environmental Physiology* 186: 503-512.
- Bech C., Nicol S.C. 1999. Thermoregulation and ventilation in the tawny frogmouth, *Podargus strigoides*: a low-metabolic avian species. *Australian Journal of Zoology* 47: 143-153.

- Benedict F.G., Fox E.L. 1927. The gaseous metabolism of large wild birds under aviary life. *Proceedings of the American Philosophical Society* 66: 511-534.
- Benedict F.G., Riddle O. 1929. The measurement of the basal heat production of pigeons: II. Physiological technique. *The Journal of Nutrition* 1: 497-536.
- Boismenu C., Gauthier G., Larochelle J. 1992. Physiology of prolonged fasting in greater snow geese (*Chen caerulescens atlantica*). *The Auk* 109: 511-521.
- Boix-Hinzen C., Lovegrove B.G. 1998. Circadian metabolic and thermoregulatory patterns of red-billed woodhoopoes (*Phoeniculus purpureus*): the influence of huddling. *Journal of Zoology* 244: 33-41.
- Bonaccorso F.J., McNab B.K. 2003. Standard energetics of leaf-nosed bats (Hipposideridae): its relationship to intermittent- and protracted-foraging tactics in bats and birds. *Journal of Comparative Physiology B* 173: 43-53.
- Bosque C., Pacheco M.A., Siegel R.B. 1999. Maintenance energy costs of two partially folivorous tropical passerines. *The Auk* 116: 246-252.
- Brown C.R. 1984. Resting metabolic rate and energetic cost of incubation in macaroni penguins *Eudyptes chrysolophus* and rockhopper penguins *E. chrysocome*. *Comparative Biochemistry and Physiology Part A: Physiology* 77: 345-350.
- Brown C.R. 1988. Energy expenditure during incubation in four species of sub-Antarctic burrowing petrels. *Ostrich* 59: 67-70.
- Brown C.R., Adams N.J. 1984. Basal metabolic rate and energy expenditure during incubation in the Wandering Albatross (*Diomedea exulans*). *The Condor* 86: 182-186.
- Bryant D.M., Furness R.W. 1995. Basal metabolic rates of North Atlantic seabirds. *Ibis* 137: 219-226.
- Bryant D.M., Hails C.J., Tatner P. 1984. Reproductive energetics of two tropical bird species. *The Auk* 101: 25-37.
- Bucher T.L. 1981. Oxygen consumption, ventilation and respiratory heat loss in a parrot, *Bolborhynchus lineola*, in relation to ambient temperature. *Journal of Comparative Physiology* 142: 479-488.
- Buttemer W.A., Nicol S.C., Sharman A. 2003. Thermoenergetics of pre-moulting and moulting kookaburras (*Dacelo novaeguineae*): they're laughing. *Journal of Comparative Physiology B* 173: 223-230.
- Calder W.A. 1964. Gaseous metabolism and water relations of the zebra finch, *Taeniopygia castanotis*. *Physiological Zoology* 37: 400-413.
- Carpenter F.L. 1976. Ecology and Evolution of an Andean Hummingbird (*Oreotrochilus estella*). University of California Publications in Zoology
- Chaplin S.B. 1982. The energetic significance of huddling behavior in common bush tits (*Psaltriparus minimus*). *The Auk* 99: 424-430.
- Collins B.G., Cary G., Payne S. 1980. Metabolism, thermoregulation and evaporative water loss in two species of Australian nectar-feeding birds (family Meliphagidae). *Comparative Biochemistry and Physiology Part A: Physiology* 67: 629-635.
- Coulombe H.N. 1970. Physiological and physical aspects of temperature regulation in the burrowing owl *Speotyto cunicularia*. *Comparative Biochemistry and Physiology* 35: 307-337.
- Crawford E.C., Jr., Lasiewski R.C. 1968. Oxygen consumption and respiratory evaporation of the emu and rhea. *The Condor* 70: 333-339.
- Daan S., Masman D., Groenewold A. 1990. Avian basal metabolic rates: their association with body composition and energy expenditure in nature. *American Journal of Physiology* 259: R333-R340.
- Dawson W. 1954. Temperature regulation and water requirements of the brown and abert towhees, *Pipilo fuscus* and *Pipilo aberti*. University of California Publications in Zoology 59: 81-124.
- Dawson W.R., Bennett A.F. 1973. Roles of metabolic level and temperature regulation in the adjustment of Western plumed pigeons (*Lophophaps ferruginea*) to desert conditions. *Comparative Biochemistry and Physiology Part A: Physiology* 44: 249-266.
- Dawson W.R., Carey C. 1976. Seasonal acclimatization to temperature in cardueline finches. *Journal of Comparative Physiology* 112: 317-333.
- Dawson W.R., Fisher C.D. 1969. Responses to temperature by the spotted nightjar (*Eurostopodus guttatus*). *The Condor* 71: 49-53.



- Dawson W.R., Tordoff H.B. 1964. Relation of oxygen consumption to temperature in the red and white-winged crossbills. *The Auk* 81: 26-35.
- Drent R.H., Stonehouse B. 1971. Thermoregulatory responses of the peruvian penguin, *Spheniscus humboldti*. *Comparative Biochemistry and Physiology Part A: Physiology* 40: 689-710.
- Eberhardt L.S. 1994. Oxygen consumption during singing by male Carolina Wrens (*Thryothorus ludovicianus*). *The Auk* 111: 124-130.
- Edwards T.C. 1987. Standard rate of metabolism in the Common Barn-Owl (*Tyto alba*). *The Wilson Bulletin* 99: 704-706.
- Ehlers R., Morton M.L. 1982. Metabolic rate and evaporative water loss in the least seed-snipe, *Thinocorus rumicivorus*. *Comparative Biochemistry and Physiology Part A: Physiology* 73: 233-235.
- Ellis H. 1980. Metabolism and solar radiation in dark and white herons in hot climates. *Physiological Zoology* 53: 358-372.
- Ellis H.I., Jehl J.R. 2003. Temperature regulation and the constraints of climate in the Eared Grebe. *Waterbirds: The International Journal of Waterbird Biology* 26: 275-279.
- Enger P.S. 1957. Heat regulation and metabolism in some tropical mammals and birds. *Acta Physiologica Scandinavica* 40: 161-166.
- Gabrielsen G.W., Taylor J.R.E., Konarzewski M., Mehlum F. 1991. Field and laboratory metabolism and thermoregulation in Dovekies (*Alle alle*). *The Auk* 108: 71-78.
- Ganey J.L., Balda R.P., King R.M. 1993. Metabolic rate and evaporative water loss of Mexican Spotted and Great Horned Owls. *Wilson Bulletin* 105: 645-656.
- Gavrilov V.M. 1977. Energetics of penguins [in Russian]. In: Il'ichev V.D. (ed) *Adaptatsii Pingvinov* (Adaptations of Penguins). Nauka, Moscow, pp. 102-110.
- Gavrilov V.M. 1997. Energetics and avian behavior (Physiology and General Biology Reviews. Vol. 11). Harwood Academic Publishers, Amsterdam.
- Gavrilov V.M., Dolnik V.R. 1985: Basal metabolic rate, thermoregulation and existence energy in birds: world data. pp. 421-466 in Ilyichov V.D., Gavrilov V.M., eds. *Acta XVIII Congressus Internationalis Ornithologici*. Nauka, Moscow. Gavrilov V.M., Dolnik V.R. 1985. Basal metabolic rate, thermoregulation and existence energy in birds: world data. Nauka, Moscow.
- Gavrilov V.V. 1996. Standard metabolism, energy of life and energy cost of non-flight activities in the Cuneate-tailed Gull *Rhodostethia rosea* (Laridae, Aves). *Biology Bulletin* 23: 55-59.
- Gerald R., Robert B. 1973. Standard metabolic rate and lower critical temperature for the Ruffed Grouse. *The Wilson Bulletin* 85: 223-229.
- Gessaman J.A. 1972. Bioenergetics of the snowy owl (*Nyctea scandiaca*). *Arctic and Alpine Research* 4: 223-238.
- Giaja J., Males B. 1928. Sur le valeur du métabolisme de base de quelques animaux en fonction de leur surface. *Annales de Physiologie et de Physicochimie Biologique* 4: 875-904.
- Goldstein R.B. 1974. Relation of metabolism to ambient temperature in the Verdin. *The Condor* 76: 116-119.
- Graber R.R. 1962. Food and oxygen consumption in three species of owls (Strigidae). *The Condor* 64: 473-487.
- Grajal A. 1991: Nutritional ecology and digestive physiology of the hoatzin, *Opisthocomus hoazin*, a folivorous bird with foregut fermentation. University of Florida, Gainesville, Florida, US. Grajal A. 1991. Nutritional ecology and digestive physiology of the hoatzin, *Opisthocomus hoazin*, a folivorous bird with foregut fermentation, University of Florida, Gainesville, Florida, US.
- Grant G.S., Whittow G.C. 1983. Metabolic cost of incubation in the Laysan albatross and Bonin petrel. *Comparative Biochemistry and Physiology, Part A: Physiology* 74: 77-82.
- Hails C.J. 1983. The metabolic rate of tropical birds. *The Condor* 85: 61-65.
- Hainsworth F.R., Wolf L.L. 1970. Regulation of oxygen consumption and body temperature during torpor in a hummingbird, *Eulampis jugularis*. *Science* 168: 368-369.
- Hayworth A.M., Weathers W.W. 1984. Temperature regulation and climatic adaptation in black-billed and yellow-billed magpies. *The Condor* 86: 19-26.

- Hennemann III W.W. 1983. Environmental influences on the energetics and behavior of anhingas and double-crested cormorants. *Physiological Zoology* 56: 201-216.
- Herzog D. 1930. Untersuchungen über den Grundumsatz der Vögel. *Wissenschaftliches Archiv für Landwirtschaft* 3: 601-626.
- Hinds D.S., Calder W.A. 1973. Temperature regulation of the Pyrrhuloxia and the Arizona Cardinal. *Physiological Zoology* 46: 55-71.
- Hinsley S.A., Ferns P.N., Thomas D.H., Pinshow B. 1993. Black-Bellied Sandgrouse (*Pterocles orientalis*) and Pin-Tailed Sandgrouse (*Pterocles alchata*): closely related species with differing bioenergetic adaptations to arid zones. *Physiological Zoology* 66: 20-42.
- Hoffmann R., Prinzinger R. 1984. Torpor und Nahrungsausnutzung bei 4 Mausvogelarten (Coliiformes). *Journal für Ornithologie* 125: 225-237.
- Hohtola E., Pyörnilä A., Rintamäki H. 1994. Fasting endurance and cold resistance without hypothermia in a small predatory bird: the metabolic strategy of Tengmalm's owl, *Aegolius funereus*. *Journal of Comparative Physiology B* 164: 430-437.
- Holmes R.T., Sawyer R.H. 1975. Oxygen consumption in relation to ambient temperature in five species of forest-dwelling thrushes (*Hylocichla* and *Catharus*). *Comparative Biochemistry and Physiology Part A: Physiology* 50: 527-531.
- Hudson J.W., Brush A.H. 1964. A comparative study of the cardiac and metabolic performance of the dove, *Zenaidura macroura*, and the quail, *Lophortyx californicus*. *Comparative Biochemistry and Physiology* 12: 157-170.
- Irving L., Krog H., Manson M. 1955. The metabolism of some Alaskan animals in winter and summer. *Physiological Zoology* 28: 173-185.
- Iversen J.A., Krog J. 1972. Body temperature and resting metabolism rates in small petrels. *Norwegian Journal of Zoology* 20: 141-144.
- Jenssen B.M., Ekker M., Bech C. 1989. Thermoregulation in winter-acclimatized common eiders (*Somateria mollissima*) in air and water. *Canadian Journal of Zoology* 67: 669-673.
- Johnson R.E. 1968. Temperature regulation in the white-tailed ptarmigan, *Lagopus leucurus*. *Comparative Biochemistry and Physiology* 24: 1003-1014.
- Johnson S.R., Cowan I.M. 1974. Thermal adaptation as a factor affecting colonizing success of introduced Sturnidae (Aves) in North America. *Canadian Journal of Zoology* 52: 1559-1576.
- Johnson W.D., Collins C.T. 1975. Notes on the metabolism of the Cuckoo Owllet and Hawk Owl. *Bulletin of the Southern California Academy of Sciences* 74: 44-45.
- Jos B.W. 1999. Heat production and evaporative water loss of Dune Larks from the Namib desert. *The Condor* 101: 432-438.
- Kahl Jr. M.P. 1963. Thermoregulation in the Wood Stork, with special reference to the role of the legs. *Physiological Zoology* 36: 141-151.
- Kendeigh S.C., Dolnik V.R., Gavrilov V.M. 1977. Avian energetics. In: Pinowski J., Kendeigh S.C. (eds). *Granivorous Birds in Ecosystems*. Cambridge University Press, Cambridge, pp. 127-204.
- Kersten M., Piersma T. 1987. High levels of energy expenditure in shorebirds: metabolic adaptations to an energetically expensive way of life. *Ardea* 75: 175-187.
- Klaassen M. 1995. Molt and basal metabolic costs in males of two subspecies of stonechats: the European *Saxicola torquata rubicula* and the East African *S. t. axillaris*. *Oecologia* 104: 424-432.
- Kooyman G.L., Gentry R.L., Bergman W.P., Hammel H.T. 1976. Heat loss in penguins during immersion and compression. *Comparative Biochemistry and Physiology Part A: Physiology* 54: 75-80.
- Larochelle J., Delson J., Schmidt-Nielsen K. 1982. Temperature regulation in the Black Vulture. *Canadian Journal of Zoology* 60: 491-494.
- Lasiewski R.C. 1963. Oxygen consumption of torpid, resting, active, and flying hummingbirds. *Physiological Zoology* 36: 122-140.
- Lasiewski R.C., Dawson W.R. 1967. A re-examination of the relation between standard metabolic rate and body weight in birds. *The Condor* 69: 13-23.

- Lasiewski R.C., Dawson W.R., Bartholomew G.A. 1970. Temperature regulation in the little Papuan frogmouth, *Podargus ocellatus*. The Condor 72: 332-338.
- Lasiewski R.C., Hubbard S.H., Moberly W.R. 1964. Energetic relationships of a very small passerine bird. The Condor 66: 212-220.
- Lasiewski R.C., Richard J.L. 1967. Physiological responses of the blue-throated and Rivoli's hummingbirds. The Auk 84: 34-48.
- Lasiewski R.C., Weathers W.W., Bernstein M.H. 1967. Physiological responses of the giant hummingbird, *Patagona gigas*. Comparative Biochemistry and Physiology 23: 797-813.
- Ligon J.D. 1968. The biology of the elf owl, *Micrathene whitneyi* (University of Michigan. Museum of Zoology. Miscellaneous publications. Museum of Zoology, University of Michigan.
- Ligon J.D. 1969. Some aspects of temperature relations in small owls. The Auk 86: 458-472.
- Liknes E.T., Swanson D.L. 1996. Seasonal variation in cold tolerance, basal metabolic rate, and maximal capacity for thermogenesis in White-breasted Nuthatches *Sitta carolinensis* and Downy Woodpeckers *Picoides pubescens*, two unrelated arboreal temperate residents. Journal of Avian Biology 27: 279-288.
- Lindström Å., Kvist A. 1995. Maximum energy intake rate is proportional to basal metabolic rate in passerine birds. Proceedings of the Royal Society of London. Series B: Biological Sciences 261: 337-343.
- Londoño G.A., Chappell M.A., Castañeda M.d.R., Jankowski J.E., Robinson S.K. 2015. Basal metabolism in tropical birds: latitude, altitude, and the "pace of life". Functional Ecology 29: 338-346.
- López-Calleja M.V., Bozinovic F. 1995. Maximum metabolic rate, thermal insulation and aerobic scope in a small-sized Chilean hummingbird (*Sephanoides sephanoides*). The Auk 112: 1034-1036.
- Lovegrove B.G., Smith G.A. 2003. Is 'nocturnal hypothermia' a valid physiological concept in small birds?: a study on Bronze Mannikins *Spermestes cucullatus*. Ibis 145: 547-557.
- MacMillen R.E. 1974. Bioenergetics of Hawaiian honeycreepers: the Amakihi (*Loxops virens*) and the Anianiau (*L. parva*). The Condor 76: 62-69.
- MacMillen R.E. 1981. Nonconformance of standard metabolic rate with body mass in Hawaiian honeycreepers. Oecologia 49: 340-343.
- MacMillen R.E., Carpenter F.L. 1977. Daily energy costs and body weight in nectarivorous birds. Comparative Biochemistry and Physiology Part A: Physiology 56: 439-441.
- MacMillen R.E., Trost C.H. 1965. Oxygen consumption and water loss in the Inca dove, *Scardafella inca*. American Zoologist 5 (Abstracts of the summer meeting of the American Society of Zoologists. August 17-20, 1965. University of Illinois, Urbana, Illinois): 208-209.
- MacMillen R.E., Trost C.H. 1967. Thermoregulation and water loss in the Inca dove. Comparative Biochemistry and Physiology 20: 263-273.
- Maloney S.K., Dawson T.J. 1994. Thermoregulation in a large bird, the emu (*Dromaius novaehollandiae*). Journal of Comparative Physiology B 164: 464-472.
- Marder J., Bernstein R. 1983. Heat balance of the partridge *Alectoris chukar* exposed to moderate, high and extreme thermal stress. Comparative Biochemistry and Physiology Part A: Physiology 74: 149-154.
- Marschall U., Prinzinger R. 1991. Vergleichende Ökophysiologie von fünf Prachtfinkenarten (Estrildidae). Journal für Ornithologie 132: 319-323.
- McKechnie A., Lovegrove B. 2001a. Heterothermic responses in the speckled mousebird (*Colius striatus*). Journal of Comparative Physiology B 171: 507-518.
- McKechnie A.E., Körtner G., Lovegrove B.G. 2004. Rest-phase thermoregulation in free-ranging white-backed mousebirds. The Condor 106: 143-149.
- McKechnie A.E., Lovegrove B.G. 2001b. Thermoregulation and the energetic significance of clustering behavior in the white-backed mousebird (*Colius colius*). Physiological and Biochemical Zoology 74: 238-249.
- McKechnie A.E., Lovegrove B.G. 2003. Facultative hypothermic responses in an Afrotropical arid-zone passerine, the red-headed finch (*Amadina erythrocephala*). Journal of Comparative Physiology B 173: 339-346.

- McNab B.K. 1996. Metabolism and temperature regulation of kiwis (Apterygidae). *The Auk* 113: 687-692.
- McNab B.K. 2000. The influence of body mass, climate, and distribution on the energetics of South Pacific pigeons. *Comparative Biochemistry and Physiology. Part A: Molecular & Integrative Physiology* 127: 309-329.
- McNab B.K. 2001. Energetics of toucans, a barbet, and a hornbill: implications for avian frugivory. *The Auk* 118: 916-933.
- McNab B.K. 2003. The energetics of New Zealand's ducks. *Comparative Biochemistry and Physiology Part A: Molecular & Integrative Physiology* 135: 229-247.
- McNab B.K. 2005. Food habits and the evolution of energetics in birds of paradise (Paradisaeidae). *Journal of Comparative Physiology. B: Biochemical, Systemic, and Environmental Physiology* 175: 117-132.
- McNab B.K. 2009. Ecological factors affect the level and scaling of avian BMR. *Comparative Biochemistry and Physiology. Part A: Molecular & Integrative Physiology* 152: 22-45.
- McNab B.K., Bonaccorso F.J. 1995. The energetics of Australasian swifts, frogmouths, and nightjars. *Physiological Zoology* 68: 245-261.
- McNab B.K., Ellis H.I. 2006. Flightless rails endemic to islands have lower energy expenditures and clutch sizes than flighted rails on islands and continents. *Comparative Biochemistry and Physiology Part A: Molecular & Integrative Physiology* 145: 295-311.
- McNab B.K., Salisbury C.A. 1995. Energetics of New Zealand's temperate parrots. *New Zealand Journal of Zoology* 22: 339-349.
- Merola-Zwartjes M. 1998. Metabolic rate, temperature regulation, and the energetic implications of roost nests in the bananaquit (*Coereba flaveola*). *The Auk* 115: 780-786.
- Merola-Zwartjes M., Ligon J.D. 2000. Ecological energetics of the Puerto Rican tody: heterothermy, torpor, and intra-island variation. *Ecology* 81: 990-1003.
- Misch M.S. 1960. Heat regulation in the northern Blue Jay, *Cyanocitta cristata* *bromia* Oberholser. *Physiological Zoology* 33: 252-259.
- Mock P.J. 1991. Daily allocation of time and energy of western bluebird feeding nestlings. *The Condor* 93: 598-611.
- Mortensen A., Blix A.S. 1986. Seasonal changes in resting metabolic rate and mass specific conductance in Svalbard ptarmigan, Norwegian rock ptarmigan and Norwegian willow ptarmigan. *Ornis Scandinavica* 17: 8-13.
- Mugaas J.N., Templeton J.R. 1970. Thermoregulation of the red-breasted nuthatch (*Sitta canadensis*). *The Condor* 72: 125-132.
- Murrish D.E. 1970. Responses to temperature in the dipper, *Cinclus mexicanus*. *Comparative Biochemistry and Physiology* 34: 859-869.
- Ohmart R.D., Lasiewski R.C. 1971. Roadrunners: energy conservation by hypothermia and absorption of sunlight. *Science* 172: 67-69.
- Pekins P.J., Gessaman J.A., Lindzey F.G. 1992. Winter energy requirements of blue grouse. *Canadian Journal of Zoology* 70: 22-24.
- Piersma T., Cadée N., Daan S. 1995. Seasonality in basal metabolic rate and thermal conductance in a long-distance migrant shorebird, the knot (*Calidris canutus*). *Journal of Comparative Physiology B* 165: 37-45.
- Pinshow B., Fedak M.A., Battles D.R., Schmidt-Nielsen K. 1976. Energy expenditure for thermoregulation and locomotion in emperor penguins. *American Journal of Physiology* 231: 903-912.
- Pinshow B., Fedak M.A., Schmidt-Nielsen K. 1977. Terrestrial locomotion in penguins: it costs more to waddle. *Science* 195: 592-594.
- Prinzinger R. 1988. Energy metabolism, body-temperature and breathing parameters in nontorpid blue-naped mousebirds *Urocolius macrourus*. *Journal of Comparative Physiology B* 157: 801-806.
- Prinzinger R., Göppel R., Lorenz A., Kulzer E. 1981. Body temperature and metabolism in the red-backed mousebird (*Colius castanotus*) during fasting and torpor. *Comparative Biochemistry and Physiology Part A: Physiology* 69: 689-692.

- Prinzinger R., Hänssler I. 1980. Metabolism-weight relationship in some small nonpasserine birds. *Experientia* 36: 1299-1300.
- Prinzinger R., Lübben I., Schuchmann K.L. 1989. Energy metabolism and body temperature in 13 sunbird species (Nectariniidae). *Comparative Biochemistry and Physiology Part A: Physiology* 92: 393-402.
- Prinzinger R., Misovic A., Schleucher E. 1993. Energieumsatz und Körpertemperatur bei der Zwergwachtel (*Coturnix chinensis*) und beim Bindenlaufhühnchen (*Turnix suscitator*). *Journal für Ornithologie* 134: 79-84.
- Reinertsen R.E., Haftorn S. 1986. Different metabolic strategies of northern birds for nocturnal survival. *Journal of Comparative Physiology B* 156: 655-663.
- Rezende E.L., López-Calleja M.V., Bozinovic F. 2001. Standard and comparative energetics of a small avian herbivore (*Phytotoma rara*). *The Auk* 118: 781-785.
- Ricklefs R.E., Matthew K.K. 1983. Rates of oxygen consumption in four species of seabird at Palmer Station, Antarctic Peninsula. *Comparative Biochemistry and Physiology Part A: Physiology* 74: 885-888.
- Ricklefs R.E., White S.C., Cullen J. 1980. Energetics of postnatal growth in Leach's storm-petrel. *The Auk* 97: 566-575.
- Rising J.D. 1969. A comparison of metabolism and evaporative water loss of Baltimore and Bullock orioles. *Comparative Biochemistry and Physiology* 31: 915-925.
- Rising J.D., Hudson J.W. 1974. Seasonal variation in the metabolism and thyroid activity of the black-capped chickadee (*Parus atricapillus*). *The Condor* 76: 198-203.
- Roberts J.R., Baudinette R.V. 1986. Thermoregulation, oxygen consumption and water turnover in stubble quail, *Coturnix pectoralis*, and king quail, *Coturnix chinensis*. *Australian Journal of Zoology* 34: 25-33.
- Ryan P.G., Watkins B.P., Siegfried W.R. 1989. Morphometrics, metabolic rate and body temperature of the smallest flightless bird: the Inaccessible island rail. *The Condor* 91: 465-467.
- Schleucher E. 2001. Heterothermia in pigeons and doves reduces energetic costs. *Journal of Thermal Biology* 26: 287-293.
- Schleucher E. 2002. Metabolism, body temperature and thermal conductance of fruit-doves (Aves: Columbidae, Treroninae). *Comparative Biochemistry and Physiology Part A: Molecular & Integrative Physiology* 131: 417-428.
- Schleucher E., Withers P.C. 2002. Metabolic and thermal physiology of pigeons and doves. *Physiological and Biochemical Zoology: Ecological and Evolutionary Approaches* 75: 439-450.
- Scholander P.F. 1940. *Experimental Investigations On the Respiratory Function In Diving Mammals and Birds: With 88 Figures In the Text.* I kommisjon hos Jacob Dybwad, Oslo.
- Scholander P.F., Hock R., Walters V., Johnson F., Irving L. 1950. Heat regulation in some arctic and tropical mammals and birds. *Biological Bulletin* 99: 237-258.
- Seavy N.E. 2006. Physiological correlates of habitat association in East African sunbirds (Nectariniidae). *Journal of Zoology* 270: 290-297.
- Seavy N.E., McNab B.K. 2007. Energetics of East African Pycnonotids. *Biotropica* 39: 114-119.
- Terroine E.F., Trautmann S. 1927. Influence de la température extérieure sur la production calorifique des homéothermes et loi des surfaces. *Annales de Physiologie et de Physicochimie Biologique* 3: 422-457.
- Tieleman B.I., Williams J.B., Bloomer P. 2003. Adaptation of metabolism and evaporative water loss along an aridity gradient. *Proceedings of the Royal Society of London. Series B: Biological Sciences* 270: 207-214.
- Trost C.H. 1972. Adaptations of horned larks (*Eremophila alpestris*) to hot environments. *The Auk* 89: 506-527.
- Vander Haegen W.M., Owen R.B., Krohn W.B. 1994. Metabolic rate of american woodcock. *The Wilson Bulletin* 106: 338-343.
- Veghte J.H. 1964. Thermal and metabolic responses of the gray jay to cold stress. *Physiological Zoology* 37: 316-328.
- Vitali S., Withers P., Richardson K. 1999. Standard metabolic rates of three nectarivorous meliphagid passerine birds. *Australian Journal of Zoology* 47: 385-391.

- Vleck C.M., Kenagy G.J. 1980. Embryonic metabolism of the Fork-tailed Storm Petrel: physiological patterns during prolonged and interrupted incubation. *Physiological Zoology* 53: 32-42.
- Vleck C.M., Vleck D. 1979. Metabolic rate in five tropical bird species. *The Condor* 81: 89-91.
- Wasser J.S. 1986. The relationship of energetics of falconiform birds to body mass and climate. *The Condor* 88: 57-62.
- Weathers W.W. 1977. Temperature regulation in the dusky munia, *Lonchura fuscans* (Cassin) (Estrildidae). *Australian Journal of Zoology* 25: 193-199.
- Weathers W.W. 1981. Physiological thermoregulation in heat-stressed birds: consequences of body size. *Physiological Zoology* 54: 345-361.
- Weathers W.W., Caccamise D.F. 1978. Seasonal acclimatization to temperature in monk parakeets. *Oecologia* 35: 173-183.
- Weathers W.W., Schoenbaechler D.C. 1976. Regulation of body temperature in the Budherygah, *Melopsittacus undulatus*. *Australian Journal of Zoology* 24: 39-47.
- Weathers W.W., van Riper C., III. 1982. Temperature regulation in two endangered Hawaiian honeycreepers: the Palila (*Psittirostra bailleui*) and the Laysan finch (*Psittirostra cantans*). *The Auk* 99: 667-674.
- Weathers W.W., Weathers D.L., van Riper C., III. 1983. Basal metabolism of the apapane: comparison of freshly caught birds with long-term captives. *The Auk* 100: 977-978.
- West G.C., Hart J.S. 1966. Metabolic responses of evening grosbeaks to constant and to fluctuating temperatures. *Physiological Zoology* 39: 171-184.
- Wiersma P., Muñoz-García A., Walker A., Williams J.B. 2007. Tropical birds have a slow pace of life. *Proceedings of the National Academy of Sciences of the United States of America* 104: 9340-9345.
- Wijnandts H. 1984. Ecological energetics of the long-eared owl (*Asio otus*). *Ardea* 55: 1-92.
- Williams J.B., Hansell H. 1981. Bioenergetics of captive Belding's savannah sparrows (*Passerculus sandwichensis beldingi*). *Comparative Biochemistry and Physiology Part A: Physiology* 69: 783-787.
- Williams J.B., Withers P.C., Bradshaw S.D., Nagy K.A. 1991. Metabolism and water flux of captive and free-living Australian parrots. *Australian Journal of Zoology* 39: 131-142.
- Willoughby E.J. 1969. Evaporative water loss of a small xerophilous finch, *Lonchura malabarica*. *Comparative Biochemistry and Physiology* 28: 655-664.
- Withers P.C. 1983. Energy, water, and solute balance of the ostrich *Struthio camelus*. *Physiological Zoology* 56: 568-579.
- Withers P.C., Forbes R.B., Hedrick M.S. 1987. Metabolic, water and thermal relations of the Chilean tinamou. *The Condor* 89: 424-426.
- Withers P.C., Williams J.B. 1990. Metabolic rate and respiratory physiology of an arid-adapted Australian bird, the Spinifex Pigeon. *The Condor* 92: 961-969.
- Wunder B.A. 1979. Evaporative water loss from birds: effects of artificial radiation. *Comparative Biochemistry and Physiology Part A: Physiology* 63: 493-494.
- Wunder B.A., Trebella J.J. 1976. Effects of nasal tufts and nasal respiration on thermoregulation and evaporative water loss in the common crow. *The Condor* 78: 564-567.
- Yarbrough C.G. 1971. The influence of distribution and ecology on the thermoregulation of small birds. *Comparative Biochemistry and Physiology* 39A: 235-266.
